# Supplementary material for: The Combined Loss of Triose Phosphate and Xylulose 5-Phosphate/Phosphate Translocators Leads to Severe Growth Retardation and Impaired Photosynthesis in Arabidopsis thaliana tpt/xpt Double Mutants
Source: PubMed Central journal article supplement (PMC6175978; doi:10.3389/fpls.2018.01331), 2018-10-02
Supplement: Data_Sheet_2.pdf [file Data_Sheet_2.pdf]

## Supplementary Tables

**Supplementary Table 1. Oligonucleotide Primers used for mutant screening (A) and verification (B). The sequences are given from the 5' to 3' end.**

### A Screening

|                                 |                                                        |
|---------------------------------|--------------------------------------------------------|
|                                 | <b><i>gpt2-1</i> mutant</b>                            |
| <i>GPT2-1</i> (f)               | GTCGGACCAAACCTTTGTCTGGT                                |
| <i>GPT2-1</i> (r)               | GGTCTGATCAAGAAATGACACTGA                               |
| LB <sub><i>gpt2-1</i></sub> (f) | ATATTGACCATCATACTCATTGC                                |
|                                 | <b><i>tpt-1</i> mutant</b>                             |
| <i>TPT-1</i> (f)                | GTAACCTACGAGTAAACTGGCTAC                               |
| <i>TPT-1</i> (r)                | AGCAGCCGCATTGAAGAATGGCTC AA                            |
| LB <sub><i>tpt-1</i></sub> (f)  | GATGCACTCGAAATCAGCCAATTTTAGAC                          |
|                                 | <b><i>tpt-2</i> mutant</b>                             |
| <i>TPT-2</i> (f)                | GTAACCTACGAGTAAACTGGCTAC                               |
| <i>TPT-2</i> B (f)              | GACCATTAACCTACCATAACTCC                                |
| <i>TPT-2</i> (r)                | TGACTAGCCATGGATACTTGCGGAGGA                            |
| LB <sub><i>tpt-2</i></sub> (f)  | GTCCGCAATGTGTTATTAAGTTGTC                              |
|                                 | <b><i>xpt-1</i> mutant</b>                             |
| <i>XPT-1</i> (f)                | GGCTTTCACCGATTCCCAA                                    |
| <i>XPT-1</i> (r)                | ATCAAGTAGACGAGGTCAAGAACTAAGTA                          |
| LB <sub><i>xpt-1</i></sub> (f)  | CATTTTATAATAACGCTGCGGACATCTAC                          |
|                                 | <b><i>xpt-2</i> mutant</b>                             |
| <i>XPT-2</i> (f)                | AAAAGACAAATGATGGCATCG                                  |
| <i>XPT-2</i> (r)                | TAACGGATACGAATCACCGAG                                  |
|                                 | <b><i>xpt-3</i> mutant</b>                             |
| <i>XPT-3</i> (f)                | CTTTTTCTCATCTCCTGCGTG                                  |
| <i>XPT-3</i> (r)                | TCTGGATTTGAATCCGATGAG                                  |
| LB3 (pCSA110)                   | TAGCATCTGAATTTTATAACCAATCTCGATACAC                     |
|                                 | <b>amiRNA:<i>XPT</i> construction and verification</b> |
| <i>XPT</i> , miR-s I            | GATAATGGCTTTATGGTAACCTCTCTCTCTTTTGTATTCC               |
| <i>XPT</i> , miR-a II           | GAGAGGTTACCATAAAGCCATTATCAAAGAGAATCAATGA               |
| <i>XPT</i> , miR*s III          | GAGAAGTTACCATAATGCCATTTTACAGGTCGTGATAT G               |
| <i>XPT</i> , miR*a IV           | GAAAATGGCATTATGGTAACTTCTCTACATATATATTCC T              |
| pRS300A TOPO (f)                | CACC CTGCAAGGCGATTAAGTTGGGTAAC                         |
| pRS300B (r)                     | GCGGATAACAATTTTACACAGGAAACAG                           |
| CaMV 35S (f)                    | GCAAGACCCTTCTCTATATAAG                                 |

### B RT-PCR

|                     |                                |
|---------------------|--------------------------------|
| RT_ <i>XPT</i> (f)* | CACC ATGATCTCCCTGAATCTATCTCCT  |
| RT_ <i>XPT</i> (r)  | TTAGTTCTTCTTATCACCTCCCCTTCAATC |
| RT_Actin2 (f)       | TTGGTAGGCCAAGACATCAT           |
| RT_Actin2 (r)       | GGAGCCTCGGTAAGAAGAAC           |

\*The same primer was used for TOPO cloning. (f) = forward; (r) = reverse

**Supplementary Table 2. Chl *a* fluorescence parameters of wild-type and mutant plants impaired in XPT and TPT as well as starch biosynthesis.**

| Biotype                     | $F_v/F_m$     | $\Phi_{PSII}$ (281) | Relative $ETR_{(700)}$ |
|-----------------------------|---------------|---------------------|------------------------|
| Ws-2                        | 0.778 ± 0.001 | 0.405 ± 0.005       | 79.53 ± 1.35           |
| <i>xpt-1</i>                | 0.787 ± 0.002 | 0.409 ± 0.002       | 80.67 ± 0.92           |
| <i>tpt-1</i>                | 0.743 ± 0.008 | 0.366 ± 0.010       | 60.71 ± 2.45           |
| <i>tpt-1/xpt-1</i>          | 0.544 ± 0.022 | 0.229 ± 0.017       | 28.19 ± 2.93           |
| Col-0                       | 0.769 ± 0.005 | 0.407 ± 0.012       | 71.32 ± 3.40           |
| <i>tpt-2</i>                | 0.751 ± 0.003 | 0.414 ± 0.008       | 67.39 ± 1.32           |
| <i>tpt-2/xpt-1</i>          | 0.492 ± 0.022 | 0.192 ± 0.010       | 19.64 ± 2.77           |
| amiRNA: <i>XPT tpt-2</i> #3 | 0.701 ± 0.041 | 0.361 ± 0.033       | 58.56 ± 6.29           |
| amiRNA: <i>XPT tpt-2</i> #4 | 0.654 ± 0.041 | 0.249 ± 0.029       | 27.08 ± 6.15           |
| <i>adg1-1/tpt-2</i>         | 0.344 ± 0.017 | 0.139 ± 0.009       | 18.03 ± 1.31           |

The plants were grown in soil for three weeks in a temperature-controlled growth cabinet under HL-conditions (PFD = 300  $\mu\text{mol}\cdot\text{m}^{-2}\cdot\text{s}^{-1}$ ) in the long-day. The Chl *a* fluorescence parameters were determined after plants were darkened for about 30 min by applying a saturating light flash. Photosynthesis was induced with actinic light at a PFD of 281  $\mu\text{mol}\cdot\text{m}^{-2}\cdot\text{s}^{-1}$  for 5 min.  $\Phi_{PSII}$  was determined at the PFD used for the induction of photosynthesis.  $ETR_{(700)}$  was determined at a PFD of 700  $\mu\text{mol}\cdot\text{m}^{-2}\cdot\text{s}^{-1}$ . The data represent the mean ± SE of n = 9 measurements. A statistical analysis of the data is contained in Doc S2, Table 3B.

**Supplementary Table 3. Pigment and protein contents as well as specific leaf fresh weights of wild-type, mutant, and amiRNA plants defective in the TPT and/or XPT.**

| Plant line                  | Chl content<br>(mg·m <sup>-2</sup> ) | Carotenoid<br>content | Chl <i>a/b</i> -ratio | Protein content<br>(mg·m <sup>-2</sup> ) | Specific fw<br>(g·m <sup>-2</sup> ) |
|-----------------------------|--------------------------------------|-----------------------|-----------------------|------------------------------------------|-------------------------------------|
| Ws-2                        | 137.8 ± 4.6                          | 20.28 ± 1.38          | 3.38 ± 0.04           | 1.28 ± 0.10                              | 98.98 ± 2.22                        |
| <i>xpt-1</i>                | 139.2 ± 5.2                          | 20.13 ± 1.47          | 3.31 ± 0.06           | 1.62 ± 0.13                              | 115.15 ± 3.33                       |
| <i>tpt-1</i>                | 131.1 ± 5.5                          | 20.41 ± 1.44          | 3.40 ± 0.06           | 1.61 ± 0.08                              | 99.96 ± 3.10                        |
| <i>tpt-1/xpt-1</i>          | 127.1 ± 6.1                          | 20.48 ± 1.55          | 3.47 ± 0.09           | 1.28 ± 0.21                              | 107.23 ± 4.09                       |
| Col-0                       | 136.6 ± 1.2                          | 18.49 ± 0.72          | 3.40 ± 0.08           | 1.61 ± 0.16                              | 120.81 ± 5.02                       |
| <i>tpt-2</i>                | 134.5 ± 4.4                          | 20.50 ± 0.78          | 3.52 ± 0.03           | 1.54 ± 0.29                              | 118.90 ± 12.76                      |
| <i>tpt-2/xpt-1</i>          | 127.8 ± 1.2                          | 21.26 ± 0.35          | 3.62 ± 0.03           | 1.54 ± 0.07                              | 114.58 ± 16.23                      |
| amiRNA: <i>XPT tpt-2</i> #3 | 136.6 ± 5.1                          | 19.50 ± 1.40          | 3.35 ± 0.02           | 1.18 ± 0.11                              | 106.45 ± 2.34                       |
| amiRNA: <i>XPT tpt-2</i> #4 | 132.3 ± 4.6                          | 20.46 ± 1.30          | 3.36 ± 0.03           | 1.52 ± 0.16                              | 107.64 ± 3.58                       |
| <i>adg1-1/tpt-2</i>         | 110.6 ± 5.0                          | 19.97 ± 0.82          | 2.96 ± 0.12           | 1.31 ± 0.10                              | 101.44 ± 3.87                       |

The plants were grown for for 33 days after sowing under LL-conditions (i.e. 30  $\mu\text{mol}\cdot\text{m}^{-2}\cdot\text{s}^{-1}$ ) in the long-day. Pigment and protein contents are expressed on a leaf area basis. The specific leaf fresh weight allows a conversion from a leaf area to a leaf weight basis. For the Chl *a/b*-ratios, Chl *a* and *b* were determined separately and the quotient calculated for each replicate. The data represent the mean  $\pm$  SE of n = 4 to 20 replicates. A statistical analysis of the data is contained in Doc S2 Table 3.



### Supplementary Table 4 (continued)

#### C Middle of the light period (8 h in the light)

| Metabolite content  | Ws-2                    | <i>xpt-1</i>      | <i>tpt-1/xpt-1</i>  | Col-0        | <i>tpt-2</i> | <i>tpt-2/xpt-1</i>  |
|---------------------|-------------------------|-------------------|---------------------|--------------|--------------|---------------------|
| Middle of the day   | nmol·g <sup>-1</sup> fw |                   |                     |              |              |                     |
| 3-PGA               | 147.2 ± 71.4            | 80.8 ± 46.0       | 47.2 ± 38.4         | 75.4 ± 35.5  | 147.0 ± 53.0 | 50.5 ± 50.0         |
| DHAP                | 46.7 ± 23.0             | 29.7 ± 14.7       | 25.9 ± 17.8         | 34.6 ± 10.4  | 44.1 ± 21.0  | 22.5 ± 12.4         |
| S-7-P               | 166.2 ± 62.8            | 101.3 ± 36.3      | 81.7 ± 53.1         | 109.8 ± 21.6 | 144.1 ± 56.4 | 59.9 ± 27.6         |
| <b>Ri5P</b>         | 4.6 ± 2.3               | 3.5 ± 1.8         | 11.6 ± 8.4          | 2.8 ± 1.0    | 6.9 ± 2.6    | <b>25.0 ± 9.9</b>   |
| <b>Xu5P+Ru5P</b>    | 33.8 ± 10.8             | 30.4 ± 8.1        | <b>190.2 ± 78.0</b> | 27.4 ± 7.2   | 95.0 ± 16.3  | <b>152.5 ± 41.4</b> |
| Fru6P               | 83.8 ± 24.2             | 56.4 ± 10.6       | 49.0 ± 21.5         | 62.9 ± 9.2   | 75.3 ± 15.7  | 52.2 ± 16.0         |
| Glc6P               | 155.1 ± 75.7            | 135.0 ± 35.9      | 108.0 ± 69.1        | 112.2 ± 32.3 | 196.6 ± 39.9 | 79.3 ± 42.1         |
| Glc1P               | 31.4 ± 4.1              | 24.4 ± 1.2        | 28.4 ± 1.5          | 26.4 ± 3.3   | 33.8 ± 5.4   | 28.6 ± 4.8          |
| UDPG                | 105.3 ± 34.8            | 101.2 ± 7.7       | 114.2 ± 12.9        | 123.5 ± 19.0 | 111.1 ± 33.1 | 107.2 ± 28.6        |
| <b>Glycerol-3-P</b> | 12.8 ± 3.4              | 11.7 ± 2.6        | <b>6.0 ± 2.9</b>    | 13.7 ± 3.3   | 20.0 ± 2.7   | 14.1 ± 4.3          |
| ATP                 | 25.6 ± 10.6             | 18.9 ± 5.5        | 21.8 ± 10.3         | 20.5 ± 7.2   | 24.2 ± 7.1   | 21.0 ± 6.5          |
| AMP                 | 22.6 ± 6.0              | 25.6 ± 3.0        | 33.6 ± 6.3          | 19.6 ± 6.7   | 26.9 ± 3.4   | 19.0 ± 10.9         |
| Asn                 | 162.7 ± 46.1            | 128.1 ± 36.4      | 129.2 ± 15.0        | 85.4 ± 21.1  | 121.6 ± 20.9 | 113.5 ± 31.4        |
| <b>Phe</b>          | 62.4 ± 6.4              | <b>44.5 ± 4.7</b> | <b>34.0 ± 3.8</b>   | 47.2 ± 5.2   | 47.1 ± 7.5   | 51.8 ± 4.8          |
| <b>Tyr</b>          | 6.6 ± 1.2               | 5.3 ± 0.8         | 4.8 ± 1.1           | 5.4 ± 0.9    | 6.0 ± 1.4    | <b>12.1 ± 1.7</b>   |
| Trp                 | 3.8 ± 0.7               | 3.5 ± 0.7         | 4.3 ± 1.2           | 3.1 ± 0.7    | 4.7 ± 1.5    | 7.6 ± 4.4           |

The plants were grown in soil under HL-conditions (PFD = 300 μmol·m<sup>-2</sup>·s<sup>-1</sup>) in the long-day. Samples were taken at the end of the dark period (**A**), the beginning (**B**), and middle of the light period (**C**). The data derive from the mean ± SE of n = 3 to 5 independent samples. Bold numbers indicate significantly increased (red) or decreased (green) contents.

**Supplementary Table 5. Metabolite contents in leaves of wild-type and mutant plants based on GC-MS analyses.**

**A Middle of the dark period (5 h in the dark)**

| Metabolite content    | Ws-2                               | <i>xpt-1</i>         | <i>tpt-1/xpt-1</i>   | Col-0         | <i>tpt-2</i>         | <i>tpt-2/xpt-1</i>   |
|-----------------------|------------------------------------|----------------------|----------------------|---------------|----------------------|----------------------|
| 5 h in the dark       | Arbitrary units·g <sup>-1</sup> fw |                      |                      |               |                      |                      |
| Glu                   | 0.189 ± 0.046                      | 0.180 ± 0.050        | 0.103 ± 0.036        | 0.165 ± 0.050 | 0.134 ± 0.032        | 0.024 ± 0.006        |
| Asp                   | 0.389 ± 0.075                      | 0.363 ± 0.095        | 0.331 ± 0.066        | 0.205 ± 0.081 | 0.249 ± 0.060        | 0.076 ± 0.021        |
| Ser                   | 0.231 ± 0.072                      | 0.254 ± 0.082        | 0.152 ± 0.039        | 0.020 ± 0.003 | 0.164 ± 0.028        | 0.226 ± 0.122        |
| <b>Gly</b>            | 0.079 ± 0.032                      | <b>0.161 ± 0.051</b> | <b>0.002 ± 0.000</b> | 0.011 ± 0.001 | 0.008 ± 0.004        | 0.010 ± 0.002        |
| Thr                   | 0.181 ± 0.059                      | 0.173 ± 0.043        | 0.089 ± 0.017        | 0.099 ± 0.043 | 0.100 ± 0.027        | 0.155 ± 0.063        |
| Pro                   | 0.208 ± 0.082                      | 0.143 ± 0.038        | 0.094 ± 0.023        | 0.035 ± 0.006 | 0.133 ± 0.031        | 0.068 ± 0.025        |
| Phe                   | 0.227 ± 0.067                      | 0.173 ± 0.063        | 0.060 ± 0.010        | 0.182 ± 0.060 | 0.199 ± 0.033        | 0.090 ± 0.033        |
| <b>Tyr</b>            | 0.236 ± 0.075                      | 0.193 ± 0.055        | 0.219 ± 0.055        | 0.183 ± 0.019 | 0.291 ± 0.052        | <b>0.509 ± 0.102</b> |
| Val                   | 0.245 ± 0.039                      | 0.245 ± 0.060        | 0.234 ± 0.080        | 0.147 ± 0.035 | 0.377 ± 0.059        | 0.296 ± 0.055        |
| Leu                   | 0.284 ± 0.097                      | 0.291 ± 0.084        | 0.330 ± 0.121        | 0.243 ± 0.092 | 0.537 ± 0.091        | 0.306 ± 0.048        |
| Ile                   | 0.124 ± 0.047                      | 0.130 ± 0.038        | 0.116 ± 0.021        | 0.045 ± 0.008 | 0.095 ± 0.027        | 0.171 ± 0.020        |
| Lys                   | 0.620 ± 0.149                      | 0.516 ± 0.131        | 0.321 ± 0.138        | 0.312 ± 0.098 | 0.210 ± 0.056        | 0.377 ± 0.091        |
| Met                   | 0.213 ± 0.061                      | 0.177 ± 0.065        | 0.070 ± 0.028        | 0.135 ± 0.061 | 0.186 ± 0.033        | 0.032 ± 0.010        |
| <b>β-Ala</b>          | 0.175 ± 0.064                      | 0.065 ± 0.027        | 0.099 ± 0.040        | 0.109 ± 0.029 | 0.354 ± 0.076        | <b>0.677 ± 0.083</b> |
| Glycerol              | 0.351 ± 0.120                      | 0.253 ± 0.077        | 0.323 ± 0.108        | 0.252 ± 0.079 | 0.324 ± 0.072        | 0.345 ± 0.101        |
| <b>Mannitol</b>       | 0.167 ± 0.064                      | 0.043 ± 0.012        | 0.167 ± 0.060        | 0.050 ± 0.018 | 0.167 ± 0.052        | <b>0.295 ± 0.065</b> |
| Myoinositol           | 0.695 ± 0.086                      | 0.663 ± 0.132        | 0.538 ± 0.102        | 0.333 ± 0.080 | 0.254 ± 0.043        | 0.423 ± 0.125        |
| Sorbitol              | 0.153 ± 0.058                      | 0.048 ± 0.009        | 0.088 ± 0.019        | 0.075 ± 0.030 | 0.150 ± 0.061        | 0.046 ± 0.017        |
| Putrescine            | 0.414 ± 0.118                      | 0.332 ± 0.086        | 0.222 ± 0.062        | 0.337 ± 0.099 | 0.297 ± 0.039        | 0.400 ± 0.063        |
| (Iso) Citrate         | 0.300 ± 0.083                      | 0.599 ± 0.243        | 0.445 ± 0.098        | 0.127 ± 0.028 | 0.292 ± 0.115        | 0.284 ± 0.068        |
| <b>2-Oxoglutarate</b> | 0.120 ± 0.022                      | 0.186 ± 0.048        | <b>0.299 ± 0.043</b> | 0.077 ± 0.024 | <b>0.250 ± 0.052</b> | <b>0.388 ± 0.069</b> |
| <b>Succinate</b>      | 0.154 ± 0.031                      | 0.185 ± 0.075        | 0.194 ± 0.049        | 0.095 ± 0.018 | 0.400 ± 0.128        | <b>0.807 ± 0.075</b> |
| <b>Fumarate</b>       | 0.458 ± 0.120                      | 0.526 ± 0.112        | 0.221 ± 0.094        | 0.332 ± 0.076 | 0.206 ± 0.050        | <b>0.080 ± 0.044</b> |
| Malate                | 0.201 ± 0.062                      | 0.163 ± 0.046        | 0.139 ± 0.037        | 0.088 ± 0.019 | 0.200 ± 0.033        | 0.121 ± 0.041        |
| Glycolate             | 0.231 ± 0.039                      | 0.153 ± 0.014        | 0.228 ± 0.043        | 0.106 ± 0.055 | 0.193 ± 0.023        | 0.237 ± 0.064        |
| Lactate               | 0.349 ± 0.113                      | 0.428 ± 0.114        | 0.619 ± 0.112        | 0.323 ± 0.111 | 0.595 ± 0.091        | 0.377 ± 0.024        |
| <b>Glycerate</b>      | 0.117 ± 0.016                      | 0.157 ± 0.040        | <b>0.470 ± 0.048</b> | 0.018 ± 0.007 | 0.203 ± 0.019        | <b>0.571 ± 0.142</b> |
| <b>Gluconate</b>      | 0.038 ± 0.013                      | 0.025 ± 0.010        | 0.099 ± 0.042        | 0.012 ± 0.004 | 0.023 ± 0.009        | <b>0.321 ± 0.041</b> |
| Maleate               | 0.312 ± 0.070                      | 0.234 ± 0.070        | 0.272 ± 0.064        | 0.129 ± 0.032 | 0.222 ± 0.026        | 0.249 ± 0.053        |
| <b>Malonate</b>       | 0.199 ± 0.063                      | 0.086 ± 0.028        | <b>0.327 ± 0.077</b> | 0.146 ± 0.066 | 0.250 ± 0.072        | <b>0.464 ± 0.075</b> |
| <b>Shikimate</b>      | 0.315 ± 0.045                      | 0.370 ± 0.083        | 0.249 ± 0.047        | 0.332 ± 0.102 | 0.442 ± 0.072        | <b>0.106 ± 0.041</b> |
| Quinate               | 0.168 ± 0.060                      | 0.053 ± 0.021        | 0.197 ± 0.083        | 0.283 ± 0.151 | 0.165 ± 0.074        | 0.161 ± 0.062        |
| <b>Glc</b>            | 0.333 ± 0.072                      | 0.382 ± 0.069        | 0.393 ± 0.064        | 0.075 ± 0.037 | 0.285 ± 0.029        | <b>0.621 ± 0.148</b> |
| <b>Fru</b>            | 0.111 ± 0.031                      | 0.182 ± 0.034        | <b>0.433 ± 0.060</b> | 0.019 ± 0.015 | 0.186 ± 0.058        | <b>0.571 ± 0.078</b> |
| Suc                   | 0.416 ± 0.074                      | 0.316 ± 0.083        | 0.215 ± 0.053        | 0.246 ± 0.048 | 0.370 ± 0.034        | 0.453 ± 0.145        |
| <b>Maltose</b>        | 0.177 ± 0.010                      | 0.208 ± 0.047        | <b>0.499 ± 0.075</b> | 0.211 ± 0.038 | <b>0.872 ± 0.054</b> | <b>0.842 ± 0.061</b> |
| Mannose               | 0.460 ± 0.051                      | 0.599 ± 0.113        | 0.460 ± 0.059        | 0.214 ± 0.070 | 0.362 ± 0.025        | 0.661 ± 0.112        |
| Xylose                | 0.268 ± 0.056                      | 0.420 ± 0.080        | 0.317 ± 0.057        | 0.212 ± 0.058 | 0.247 ± 0.018        | 0.387 ± 0.102        |

## Supplementary Table 5 (continued)

### B Beginning of the light period (1 h in the light)

| Metabolite content    | Ws-2                               | <i>xpt-1</i>         | <i>tpt-1/xpt-1</i>   | Col-0         | <i>tpt-2</i>         | <i>tpt-2/xpt-1</i>   |
|-----------------------|------------------------------------|----------------------|----------------------|---------------|----------------------|----------------------|
| 1 h in the light      | Arbitrary units·g <sup>-1</sup> fw |                      |                      |               |                      |                      |
| <b>Glu</b>            | 0.377 ± 0.050                      | 0.330 ± 0.043        | <b>0.045 ± 0.016</b> | 0.243 ± 0.078 | 0.284 ± 0.074        | 0.206 ± 0.065        |
| Asp                   | 0.382 ± 0.142                      | 0.301 ± 0.049        | 0.266 ± 0.046        | 0.261 ± 0.089 | 0.493 ± 0.116        | 0.504 ± 0.069        |
| Ser                   | 0.212 ± 0.074                      | 0.225 ± 0.066        | 0.220 ± 0.086        | 0.097 ± 0.025 | 0.346 ± 0.086        | 0.212 ± 0.088        |
| <b>Gly</b>            | 0.218 ± 0.039                      | 0.252 ± 0.038        | <b>0.098 ± 0.013</b> | 0.088 ± 0.020 | <b>0.141 ± 0.014</b> | <b>0.063 ± 0.013</b> |
| Thr                   | 0.206 ± 0.057                      | 0.191 ± 0.059        | 0.180 ± 0.077        | 0.151 ± 0.031 | 0.258 ± 0.049        | 0.213 ± 0.044        |
| Pro                   | 0.187 ± 0.042                      | 0.107 ± 0.020        | 0.147 ± 0.065        | 0.085 ± 0.025 | 0.128 ± 0.030        | 0.198 ± 0.026        |
| <b>Phe</b>            | 0.713 ± 0.092                      | 0.612 ± 0.079        | <b>0.090 ± 0.024</b> | 0.549 ± 0.099 | 0.383 ± 0.063        | 0.301 ± 0.096        |
| <b>Tyr</b>            | 0.379 ± 0.072                      | 0.521 ± 0.133        | 0.385 ± 0.077        | 0.264 ± 0.032 | 0.391 ± 0.083        | <b>0.721 ± 0.094</b> |
| <b>Val</b>            | 0.202 ± 0.033                      | <b>0.150 ± 0.052</b> | 0.214 ± 0.061        | 0.155 ± 0.025 | 0.331 ± 0.080        | <b>0.520 ± 0.028</b> |
| <b>Leu</b>            | 0.214 ± 0.051                      | <b>0.159 ± 0.053</b> | 0.216 ± 0.091        | 0.169 ± 0.042 | 0.335 ± 0.116        | <b>0.551 ± 0.077</b> |
| <b>Ile</b>            | 0.208 ± 0.034                      | <b>0.165 ± 0.044</b> | 0.248 ± 0.081        | 0.198 ± 0.032 | 0.320 ± 0.058        | <b>0.471 ± 0.056</b> |
| Lys                   | 0.625 ± 0.078                      | 0.373 ± 0.098        | 0.542 ± 0.174        | 0.382 ± 0.036 | 0.212 ± 0.093        | 0.664 ± 0.166        |
| Met                   | 0.395 ± 0.087                      | 0.317 ± 0.061        | 0.225 ± 0.039        | 0.330 ± 0.072 | 0.523 ± 0.140        | 0.172 ± 0.039        |
| <b>β-Ala</b>          | 0.111 ± 0.033                      | 0.127 ± 0.051        | <b>0.061 ± 0.028</b> | 0.150 ± 0.040 | 0.247 ± 0.053        | <b>0.833 ± 0.076</b> |
| Glycerol              | 0.390 ± 0.154                      | 0.359 ± 0.079        | 0.221 ± 0.069        | 0.249 ± 0.093 | 0.345 ± 0.132        | 0.269 ± 0.079        |
| Mannitol              | 0.155 ± 0.051                      | 0.247 ± 0.107        | 0.235 ± 0.069        | 0.141 ± 0.041 | 0.129 ± 0.021        | 0.302 ± 0.082        |
| Myoinositol           | 0.656 ± 0.089                      | 0.579 ± 0.093        | 0.541 ± 0.074        | 0.197 ± 0.043 | 0.215 ± 0.058        | 0.359 ± 0.107        |
| Sorbitol              | 0.089 ± 0.034                      | 0.222 ± 0.117        | 0.038 ± 0.006        | 0.168 ± 0.074 | 0.037 ± 0.018        | 0.069 ± 0.021        |
| Putrescine            | 0.281 ± 0.063                      | 0.266 ± 0.068        | 0.267 ± 0.086        | 0.253 ± 0.066 | 0.353 ± 0.086        | 0.321 ± 0.074        |
| (Iso) Citrate         | 0.373 ± 0.186                      | 0.286 ± 0.114        | 0.290 ± 0.027        | 0.186 ± 0.062 | 0.296 ± 0.099        | 0.390 ± 0.105        |
| <b>2-Oxoglutarate</b> | 0.293 ± 0.068                      | 0.309 ± 0.062        | 0.241 ± 0.010        | 0.126 ± 0.021 | 0.211 ± 0.043        | <b>0.454 ± 0.108</b> |
| <b>Succinate</b>      | 0.135 ± 0.052                      | 0.253 ± 0.920        | 0.121 ± 0.022        | 0.034 ± 0.009 | <b>0.207 ± 0.057</b> | <b>0.682 ± 0.093</b> |
| <b>Fumarate</b>       | 0.463 ± 0.111                      | 0.644 ± 0.118        | <b>0.221 ± 0.055</b> | 0.384 ± 0.072 | 0.216 ± 0.046        | <b>0.107 ± 0.042</b> |
| Malate                | 0.208 ± 0.067                      | 0.228 ± 0.038        | 0.168 ± 0.021        | 0.140 ± 0.028 | 0.248 ± 0.043        | 0.249 ± 0.095        |
| Glycolate             | 0.399 ± 0.096                      | 0.364 ± 0.049        | 0.333 ± 0.097        | 0.476 ± 0.139 | 0.337 ± 0.049        | 0.318 ± 0.090        |
| Lactate               | 0.614 ± 0.150                      | 0.457 ± 0.054        | 0.447 ± 0.095        | 0.387 ± 0.176 | 0.459 ± 0.120        | 0.318 ± 0.120        |
| Glycerate             | 0.350 ± 0.069                      | 0.399 ± 0.066        | 0.423 ± 0.054        | 0.137 ± 0.013 | 0.196 ± 0.049        | 0.381 ± 0.110        |
| <b>Gluconate</b>      | 0.019 ± 0.008                      | 0.009 ± 0.003        | 0.049 ± 0.013        | 0.010 ± 0.004 | 0.018 ± 0.007        | <b>0.520 ± 0.048</b> |
| Maleate               | 0.361 ± 0.152                      | 0.358 ± 0.057        | 0.262 ± 0.072        | 0.178 ± 0.061 | 0.218 ± 0.057        | 0.282 ± 0.075        |
| Malonate              | 0.065 ± 0.007                      | 0.078 ± 0.026        | 0.358 ± 0.109        | 0.050 ± 0.015 | 0.534 ± 0.224        | 0.448 ± 0.056        |
| <b>Shikimate</b>      | 0.512 ± 0.095                      | 0.515 ± 0.043        | 0.400 ± 0.027        | 0.344 ± 0.049 | 0.398 ± 0.139        | <b>0.130 ± 0.031</b> |
| Quinate               | 0.228 ± 0.098                      | 0.163 ± 0.104        | 0.022 ± 0.005        | 0.121 ± 0.052 | 0.021 ± 0.006        | 0.085 ± 0.030        |
| Glc                   | 0.528 ± 0.062                      | 0.618 ± 0.116        | 0.505 ± 0.044        | 0.325 ± 0.051 | 0.366 ± 0.049        | 0.657 ± 0.133        |
| Fru                   | 0.705 ± 0.076                      | 0.727 ± 0.076        | 0.430 ± 0.041        | 0.455 ± 0.070 | 0.302 ± 0.046        | 0.659 ± 0.115        |
| <b>Suc</b>            | 0.425 ± 0.061                      | 0.386 ± 0.102        | 0.128 ± 0.038        | 0.241 ± 0.035 | 0.345 ± 0.036        | <b>0.594 ± 0.162</b> |
| <b>Maltose</b>        | 0.026 ± 0.006                      | 0.041 ± 0.013        | 0.124 ± 0.012        | 0.020 ± 0.005 | 0.136 ± 0.051        | <b>0.701 ± 0.105</b> |
| Mannose               | 0.326 ± 0.041                      | 0.342 ± 0.078        | 0.214 ± 0.033        | 0.143 ± 0.030 | 0.157 ± 0.031        | 0.381 ± 0.093        |
| Xylose                | 0.289 ± 0.036                      | 0.410 ± 0.131        | 0.338 ± 0.056        | 0.203 ± 0.049 | 0.274 ± 0.039        | 0.419 ± 0.103        |

## Supplementary Table 5 (continued)

### C Middle of the light period (8 h in the light)

| Metabolite content | Ws-2                               | <i>xpt-1</i>         | <i>tpt-1/xpt-1</i>   | Col-0         | <i>tpt-2</i>         | <i>tpt-2/xpt-1</i>   |
|--------------------|------------------------------------|----------------------|----------------------|---------------|----------------------|----------------------|
| 8 h in the light   | Arbitrary units·g <sup>-1</sup> fw |                      |                      |               |                      |                      |
| <b>Glu</b>         | 0.423 ± 0.039                      | 0.371 ± 0.038        | <b>0.059 ± 0.026</b> | 0.294 ± 0.081 | 0.249 ± 0.068        | 0.209 ± 0.090        |
| Asp                | 0.549 ± 0.140                      | 0.302 ± 0.038        | 0.374 ± 0.077        | 0.311 ± 0.040 | 0.314 ± 0.048        | 0.443 ± 0.156        |
| Ser                | 0.536 ± 0.143                      | 0.388 ± 0.164        | 0.386 ± 0.156        | 0.177 ± 0.023 | 0.363 ± 0.113        | 0.412 ± 0.149        |
| <b>Gly</b>         | 0.716 ± 0.119                      | 0.517 ± 0.064        | <b>0.155 ± 0.030</b> | 0.299 ± 0.056 | 0.303 ± 0.041        | <b>0.100 ± 0.023</b> |
| Thr                | 0.502 ± 0.150                      | 0.275 ± 0.096        | 0.355 ± 0.098        | 0.277 ± 0.036 | 0.359 ± 0.106        | 0.517 ± 0.164        |
| <b>Pro</b>         | 0.648 ± 0.148                      | 0.145 ± 0.043        | 0.155 ± 0.032        | 0.152 ± 0.038 | 0.255 ± 0.083        | 0.239 ± 0.075        |
| <b>Phe</b>         | 0.660 ± 0.132                      | 0.528 ± 0.063        | <b>0.139 ± 0.045</b> | 0.463 ± 0.076 | 0.442 ± 0.133        | <b>0.194 ± 0.061</b> |
| Tyr                | 0.481 ± 0.103                      | 0.392 ± 0.073        | 0.279 ± 0.043        | 0.278 ± 0.091 | 0.255 ± 0.065        | 0.617 ± 0.098        |
| <b>Val</b>         | 0.459 ± 0.144                      | <b>0.088 ± 0.017</b> | <b>0.281 ± 0.024</b> | 0.156 ± 0.037 | <b>0.369 ± 0.054</b> | <b>0.627 ± 0.106</b> |
| <b>Leu</b>         | 0.468 ± 0.132                      | <b>0.093 ± 0.008</b> | <b>0.169 ± 0.037</b> | 0.193 ± 0.037 | <b>0.391 ± 0.091</b> | <b>0.672 ± 0.142</b> |
| <b>Ile</b>         | 0.487 ± 0.128                      | <b>0.123 ± 0.022</b> | <b>0.321 ± 0.032</b> | 0.269 ± 0.043 | <b>0.502 ± 0.090</b> | <b>0.689 ± 0.137</b> |
| Lys                | 0.713 ± 0.108                      | 0.547 ± 0.086        | 0.581 ± 0.069        | 0.382 ± 0.025 | 0.304 ± 0.086        | 0.574 ± 0.156        |
| <b>Met</b>         | 0.710 ± 0.130                      | 0.410 ± 0.047        | <b>0.241 ± 0.038</b> | 0.466 ± 0.083 | 0.460 ± 0.136        | <b>0.205 ± 0.087</b> |
| <b>β-Ala</b>       | 0.160 ± 0.024                      | <b>0.084 ± 0.015</b> | 0.157 ± 0.059        | 0.243 ± 0.018 | <b>0.436 ± 0.076</b> | <b>0.798 ± 0.075</b> |
| Glycerol           | 0.315 ± 0.096                      | 0.237 ± 0.070        | 0.295 ± 0.074        | 0.331 ± 0.103 | 0.422 ± 0.091        | 0.618 ± 0.126        |
| <b>Mannitol</b>    | 0.166 ± 0.039                      | 0.132 ± 0.037        | <b>0.373 ± 0.105</b> | 0.293 ± 0.077 | 0.332 ± 0.085        | <b>0.595 ± 0.157</b> |
| <b>Myoinositol</b> | 0.739 ± 0.122                      | 0.544 ± 0.068        | 0.709 ± 0.137        | 0.236 ± 0.061 | 0.153 ± 0.056        | <b>0.413 ± 0.118</b> |
| Sorbitol           | 0.058 ± 0.023                      | 0.035 ± 0.009        | 0.098 ± 0.023        | 0.110 ± 0.042 | 0.158 ± 0.055        | 0.074 ± 0.028        |
| Putrescine         | 0.555 ± 0.133                      | 0.411 ± 0.095        | 0.227 ± 0.043        | 0.497 ± 0.082 | 0.561 ± 0.023        | 0.474 ± 0.091        |
| (Iso) Citrate      | 0.108 ± 0.036                      | 0.169 ± 0.039        | 0.237 ± 0.058        | 0.155 ± 0.056 | 0.202 ± 0.061        | 0.464 ± 0.183        |
| 2-Oxoglutarate     | 0.630 ± 0.108                      | 0.447 ± 0.063        | 0.358 ± 0.060        | 0.296 ± 0.024 | 0.453 ± 0.059        | 0.574 ± 0.127        |
| <b>Succinate</b>   | 0.100 ± 0.025                      | 0.166 ± 0.041        | <b>0.304 ± 0.091</b> | 0.187 ± 0.044 | <b>0.345 ± 0.043</b> | <b>0.648 ± 0.084</b> |
| <b>Fumarate</b>    | 0.705 ± 0.105                      | 0.790 ± 0.079        | 0.391 ± 0.128        | 0.572 ± 0.056 | <b>0.280 ± 0.080</b> | <b>0.158 ± 0.078</b> |
| Malate             | 0.460 ± 0.146                      | 0.285 ± 0.059        | 0.291 ± 0.076        | 0.263 ± 0.064 | 0.344 ± 0.115        | 0.462 ± 0.165        |
| Glycolate          | 0.585 ± 0.119                      | 0.382 ± 0.046        | 0.414 ± 0.062        | 0.421 ± 0.029 | 0.419 ± 0.066        | 0.531 ± 0.083        |
| <b>Lactate</b>     | 0.448 ± 0.126                      | 0.212 ± 0.086        | 0.567 ± 0.108        | 0.372 ± 0.062 | 0.485 ± 0.095        | <b>0.726 ± 0.093</b> |
| Glycerate          | 0.526 ± 0.177                      | 0.536 ± 0.045        | 0.486 ± 0.075        | 0.243 ± 0.052 | 0.404 ± 0.121        | 0.330 ± 0.100        |
| <b>Gluconate</b>   | 0.010 ± 0.002                      | 0.018 ± 0.008        | 0.041 ± 0.016        | 0.005 ± 0.001 | 0.007 ± 0.001        | <b>0.659 ± 0.143</b> |
| Maleate            | 0.413 ± 0.148                      | 0.359 ± 0.113        | 0.463 ± 0.095        | 0.313 ± 0.092 | 0.248 ± 0.073        | 0.373 ± 0.109        |
| <b>Malonate</b>    | 0.124 ± 0.029                      | <b>0.087 ± 0.006</b> | <b>0.292 ± 0.039</b> | 0.201 ± 0.072 | 0.268 ± 0.059        | <b>0.753 ± 0.105</b> |
| Shikimate          | 0.822 ± 0.116                      | 0.523 ± 0.048        | 0.442 ± 0.074        | 0.690 ± 0.132 | 0.630 ± 0.149        | 0.355 ± 0.114        |
| <b>Quinate</b>     | 0.026 ± 0.003                      | <b>0.291 ± 0.085</b> | <b>0.045 ± 0.010</b> | 0.018 ± 0.004 | 0.075 ± 0.029        | <b>0.096 ± 0.027</b> |
| Glc                | 0.555 ± 0.119                      | 0.615 ± 0.111        | 0.461 ± 0.070        | 0.399 ± 0.107 | 0.202 ± 0.039        | 0.537 ± 0.119        |
| <b>Fru</b>         | 0.467 ± 0.111                      | 0.524 ± 0.102        | 0.333 ± 0.032        | 0.178 ± 0.045 | 0.117 ± 0.018        | <b>0.661 ± 0.097</b> |
| <b>Suc</b>         | 0.739 ± 0.127                      | 0.528 ± 0.062        | <b>0.213 ± 0.038</b> | 0.416 ± 0.097 | 0.304 ± 0.074        | 0.423 ± 0.089        |
| <b>Maltose</b>     | 0.047 ± 0.013                      | 0.042 ± 0.011        | <b>0.185 ± 0.022</b> | 0.028 ± 0.006 | 0.092 ± 0.018        | <b>0.484 ± 0.056</b> |
| Mannose            | 0.428 ± 0.129                      | 0.460 ± 0.092        | 0.383 ± 0.023        | 0.244 ± 0.047 | 0.185 ± 0.053        | 0.415 ± 0.108        |
| Xylose             | 0.533 ± 0.132                      | 0.459 ± 0.060        | 0.462 ± 0.042        | 0.296 ± 0.033 | 0.252 ± 0.034        | 0.516 ± 0.134        |

The plants were grown in soil under HL-conditions (PFD = 300 μmol·m<sup>-2</sup>·s<sup>-1</sup>) in the long-day. Samples were taken at the end of the dark period (**A**), the beginning (**B**) and middle of the light period (**C**) The data derive from the mean ± SE of n = 3 to 5 independent samples. Bold numbers indicate significantly increased (red) or decreased (green) contents.



**Supplementary Table 6. Contents of soluble amino acids in leaves of wild-type and mutant plants.**

**A 4 h in the dark (absolute)**

| Amino acid                                  | Ws-2           | <i>xpt-1</i>   | <i>tpt-1</i>  | <i>tpt-1/xpt-1</i> | Col-0         | <i>tpt-2</i>  | <i>tpt-2/xpt-1</i> | amiRNA:<br>XPT <i>tpt-2</i> #3 | amiRNA:<br>XPT <i>tpt-2</i> #4 | <i>adg1-1/tpt-2</i> |
|---------------------------------------------|----------------|----------------|---------------|--------------------|---------------|---------------|--------------------|--------------------------------|--------------------------------|---------------------|
| $\mu\text{mol}\cdot\text{g}^{-1}\text{ dw}$ |                |                |               |                    |               |               |                    |                                |                                |                     |
| <b>Glu</b>                                  | 10.76 ± 0.60   | 12.24 ± 1.10   | 12.19 ± 0.50  | 20.67 ± 1.42       | 7.97 ± 0.80   | 9.89 ± 1.14   | 14.66 ± 1.13       | 9.65 ± 0.81                    | 7.21 ± 0.66                    | 12.96 ± 1.18        |
| <b>Gln</b>                                  | 108.17 ± 9.86  | 102.51 ± 3.65  | 73.66 ± 3.79  | 57.88 ± 1.59       | 103.12 ± 4.23 | 57.51 ± 4.34  | 71.25 ± 7.05       | 59.07 ± 3.88                   | 48.60 ± 4.83                   | 35.18 ± 2.13        |
| <b>Asp</b>                                  | 2.06 ± 0.14    | 2.64 ± 0.37    | 1.94 ± 0.12   | 4.34 ± 0.38        | 1.45 ± 0.10   | 1.31 ± 0.12   | 2.13 ± 0.29        | 1.56 ± 0.19                    | 1.01 ± 0.09                    | 3.54 ± 0.28         |
| <b>Asn</b>                                  | 14.15 ± 1.60   | 14.27 ± 0.92   | 8.03 ± 0.71   | 9.18 ± 0.20        | 5.99 ± 0.41   | 4.58 ± 0.53   | 8.20 ± 6.43        | 5.08 ± 0.34                    | 3.89 ± 0.42                    | 33.68 ± 1.98        |
| <b>Ala</b>                                  | 13.12 ± 1.91   | 12.63 ± 1.36   | 8.42 ± 0.22   | 8.74 ± 0.38        | 5.11 ± 0.60   | 5.87 ± 0.39   | 23.90 ± 4.56       | 5.94 ± 0.39                    | 5.54 ± 0.37                    | 4.86 ± 0.72         |
| <b>Ser</b>                                  | 18.71 ± 2.05   | 29.43 ± 2.04   | 13.20 ± 0.50  | 16.33 ± 1.04       | 29.80 ± 1.52  | 15.34 ± 3.47  | 19.50 ± 2.10       | 10.72 ± 1.14                   | 9.23 ± 0.84                    | 11.14 ± 0.89        |
| <b>Gly</b>                                  | 22.77 ± 10.92  | 32.30 ± 6.60   | 1.26 ± 0.14   | 1.20 ± 0.09        | 3.43 ± 1.30   | 1.33 ± 0.17   | 1.67 ± 0.14        | 0.95 ± 0.13                    | 0.72 ± 0.06                    | 1.05 ± 0.05         |
| <b>Thr</b>                                  | 2.81 ± 0.16    | 3.76 ± 0.58    | 2.00 ± 0.19   | 4.91 ± 0.31        | 4.15 ± 0.54   | 3.36 ± 0.23   | 6.53 ± 0.68        | 3.02 ± 0.15                    | 2.68 ± 0.28                    | 7.74 ± 0.83         |
| <b>His</b>                                  | 1.39 ± 0.18    | 1.32 ± 0.15    | 0.85 ± 0.04   | 0.91 ± 0.06        | 0.87 ± 0.10   | 0.72 ± 0.05   | 0.97 ± 0.06        | 0.76 ± 0.06                    | 0.60 ± 0.05                    | 1.29 ± 0.03         |
| <b>Arg</b>                                  | 2.10 ± 0.30    | 1.80 ± 0.23    | 0.78 ± 0.10   | 1.30 ± 0.12        | 11.40 ± 2.12  | 1.95 ± 0.39   | 3.79 ± 1.13        | 1.07 ± 0.13                    | 1.01 ± 0.12                    | 7.60 ± 0.53         |
| <b>Phe</b>                                  | 0.79 ± 0.08    | 0.75 ± 0.06    | 0.83 ± 0.04   | 0.92 ± 0.06        | 0.48 ± 0.03   | 0.53 ± 0.04   | 1.06 ± 0.05        | 0.62 ± 0.04                    | 0.48 ± 0.06                    | 0.96 ± 0.06         |
| <b>Tyr</b>                                  | 0.40 ± 0.03    | 0.38 ± 0.05    | 0.48 ± 0.02   | 0.62 ± 0.05        | 0.27 ± 0.02   | 0.33 ± 0.02   | 0.53 ± 0.05        | 0.36 ± 0.04                    | 0.25 ± 0.02                    | 0.76 ± 0.04         |
| <b>Trp</b>                                  | 0.37 ± 0.03    | 0.38 ± 0.04    | 0.47 ± 0.03   | 0.55 ± 0.04        | 0.28 ± 0.02   | 0.36 ± 0.02   | 0.56 ± 0.04        | 0.41 ± 0.04                    | 0.28 ± 0.03                    | 0.68 ± 0.05         |
| <b>Val</b>                                  | 1.98 ± 0.09    | 1.82 ± 0.18    | 1.93 ± 0.07   | 1.95 ± 0.09        | 1.31 ± 0.03   | 1.32 ± 0.06   | 2.41 ± 0.21        | 1.46 ± 0.07                    | 1.26 ± 0.09                    | 3.07 ± 0.13         |
| <b>Leu</b>                                  | 0.50 ± 0.02    | 0.49 ± 0.06    | 0.64 ± 0.03   | 0.67 ± 0.04        | 0.79 ± 0.02   | 0.85 ± 0.09   | 1.79 ± 0.11        | 1.10 ± 0.04                    | 0.90 ± 0.10                    | 2.09 ± 0.07         |
| <b>Ile</b>                                  | 0.52 ± 0.04    | 0.51 ± 0.06    | 0.58 ± 0.04   | 0.75 ± 0.05        | 0.46 ± 0.02   | 0.38 ± 0.01   | 0.76 ± 0.15        | 0.42 ± 0.03                    | 0.32 ± 0.03                    | 1.29 ± 0.02         |
| <b>Lys</b>                                  | 0.47 ± 0.04    | 0.45 ± 0.06    | 0.59 ± 0.04   | 0.71 ± 0.06        | 0.73 ± 0.19   | 0.43 ± 0.02   | 0.75 ± 0.21        | 0.48 ± 0.06                    | 0.33 ± 0.03                    | 1.53 ± 0.20         |
| <b>Σ</b>                                    | 201.09 ± 25.17 | 217.68 ± 15.05 | 127.86 ± 5.95 | 131.62 ± 3.07      | 177.62 ± 4.81 | 106.04 ± 5.25 | 160.45 ± 7.34      | 102.67 ± 6.61                  | 84.32 ± 7.41                   | 129.42 ± 6.44       |

**Supplementary Table 6 (continued)**

**B 8 h in the light (absolute)**

| Amino acid                                  | Ws-2           | <i>xpt-1</i>  | <i>tpt-1</i>   | <i>tpt-1/xpt-1</i> | Col-0         | <i>tpt-2</i>  | <i>tpt-2/xpt-1</i> | amiRNA:<br>XPT <i>tpt-2</i> #3 | amiRNA:<br>XPT <i>tpt-2</i> #4 | <i>adg1-1/tpt-2</i> |
|---------------------------------------------|----------------|---------------|----------------|--------------------|---------------|---------------|--------------------|--------------------------------|--------------------------------|---------------------|
| $\mu\text{mol}\cdot\text{g}^{-1}\text{ dw}$ |                |               |                |                    |               |               |                    |                                |                                |                     |
| <b>Glu</b>                                  | 14.60 ± 2.03   | 18.11 ± 1.10  | 23.15 ± 2.03   | 21.85 ± 2.77       | 20.87 ± 2.53  | 20.64 ± 1.94  | 22.17 ± 2.73       | 18.38 ± 0.93                   | 18.69 ± 1.89                   | 21.37 ± 1.71        |
| <b>Gln</b>                                  | 70.81 ± 7.17   | 71.23 ± 4.82  | 61.56 ± 3.88   | 39.13 ± 6.44       | 96.96 ± 1.22  | 45.68 ± 2.80  | 50.92 ± 4.92       | 53.64 ± 4.63                   | 53.36 ± 4.43                   | 22.15 ± 2.63        |
| <b>Asp</b>                                  | 2.33 ± 0.42    | 3.82 ± 0.60   | 4.32 ± 0.44    | 6.03 ± 0.77        | 1.43 ± 0.39   | 2.08 ± 0.26   | 4.15 ± 0.60        | 2.60 ± 0.20                    | 2.69 ± 0.33                    | 3.20 ± 0.40         |
| <b>Asn</b>                                  | 11.49 ± 1.41   | 12.09 ± 0.61  | 12.14 ± 0.70   | 10.05 ± 1.42       | 7.58 ± 1.32   | 5.92 ± 0.87   | 8.38 ± 0.54        | 7.22 ± 0.46                    | 7.08 ± 0.62                    | 32.30 ± 3.18        |
| <b>Ala</b>                                  | 13.52 ± 0.82   | 14.49 ± 0.59  | 10.77 ± 0.41   | 10.53 ± 2.59       | 4.78 ± 1.67   | 4.72 ± 0.49   | 27.89 ± 5.01       | 9.23 ± 0.70                    | 8.89 ± 0.77                    | 13.85 ± 0.90        |
| <b>Ser</b>                                  | 18.80 ± 1.81   | 22.90 ± 1.20  | 35.05 ± 2.37   | 28.07 ± 2.89       | 49.04 ± 4.81  | 48.29 ± 5.99  | 24.75 ± 1.17       | 26.59 ± 0.79                   | 24.76 ± 1.68                   | 20.72 ± 1.98        |
| <b>Gly</b>                                  | 36.81 ± 2.81   | 41.94 ± 2.70  | 20.31 ± 2.13   | 5.85 ± 1.15        | 17.76 ± 5.03  | 15.40 ± 0.90  | 5.13 ± 0.30        | 8.48 ± 1.17                    | 8.81 ± 1.12                    | 2.64 ± 0.27         |
| <b>Thr</b>                                  | 3.15 ± 0.24    | 4.55 ± 0.19   | 4.61 ± 0.21    | 5.84 ± 0.45        | 5.81 ± 0.40   | 7.26 ± 0.52   | 7.23 ± 0.31        | 6.33 ± 0.28                    | 5.98 ± 0.31                    | 9.05 ± 1.02         |
| <b>His</b>                                  | 0.71 ± 0.18    | 0.99 ± 0.33   | 1.03 ± 0.17    | 0.78 ± 0.10        | 1.38 ± 0.20   | 1.21 ± 0.10   | 1.22 ± 0.06        | 1.17 ± 0.06                    | 1.15 ± 0.09                    | 1.29 ± 0.05         |
| <b>Arg</b>                                  | 2.37 ± 0.30    | 1.77 ± 0.32   | 1.80 ± 0.15    | 1.89 ± 0.34        | 7.54 ± 2.61   | 3.63 ± 0.89   | 4.79 ± 0.87        | 2.80 ± 0.15                    | 2.56 ± 0.14                    | 13.21 ± 2.88        |
| <b>Phe</b>                                  | 0.76 ± 0.06    | 0.83 ± 0.06   | 1.07 ± 0.10    | 0.95 ± 0.08        | 0.61 ± 0.14   | 0.81 ± 0.08   | 1.16 ± 0.04        | 0.87 ± 0.04                    | 0.85 ± 0.08                    | 0.88 ± 0.07         |
| <b>Tyr</b>                                  | 0.41 ± 0.05    | 0.43 ± 0.04   | 0.75 ± 0.09    | 0.65 ± 0.06        | 0.37 ± 0.03   | 0.45 ± 0.03   | 0.62 ± 0.04        | 0.44 ± 0.03                    | 0.42 ± 0.04                    | 0.70 ± 0.02         |
| <b>Trp</b>                                  | 0.35 ± 0.04    | 0.38 ± 0.03   | 0.64 ± 0.08    | 0.63 ± 0.08        | 0.50 ± 0.14   | 0.45 ± 0.04   | 0.63 ± 0.04        | 0.46 ± 0.03                    | 0.44 ± 0.05                    | 0.64 ± 0.07         |
| <b>Val</b>                                  | 1.42 ± 0.10    | 1.69 ± 0.06   | 2.06 ± 0.13    | 1.80 ± 0.18        | 1.05 ± 0.26   | 1.50 ± 0.11   | 2.64 ± 0.18        | 1.72 ± 0.09                    | 1.70 ± 0.12                    | 2.32 ± 0.14         |
| <b>Leu</b>                                  | 0.43 ± 0.05    | 0.48 ± 0.03   | 0.70 ± 0.07    | 0.61 ± 0.05        | 0.99 ± 0.17   | 0.93 ± 0.09   | 2.00 ± 0.14        | 1.06 ± 0.07                    | 1.02 ± 0.07                    | 1.21 ± 0.09         |
| <b>Ile</b>                                  | 0.61 ± 0.07    | 0.67 ± 0.05   | 1.04 ± 0.10    | 0.93 ± 0.07        | 0.61 ± 0.07   | 0.70 ± 0.04   | 0.97 ± 0.04        | 0.68 ± 0.02                    | 0.66 ± 0.04                    | 0.87 ± 0.06         |
| <b>Lys</b>                                  | 0.50 ± 0.06    | 0.52 ± 0.05   | 0.92 ± 0.10    | 0.83 ± 0.07        | 0.60 ± 0.13   | 0.59 ± 0.05   | 0.88 ± 0.06        | 0.62 ± 0.04                    | 0.54 ± 0.03                    | 1.55 ± 0.05         |
| <b>Σ</b>                                    | 179.08 ± 15.03 | 196.88 ± 8.64 | 181.92 ± 10.81 | 136.42 ± 17.13     | 217.78 ± 8.17 | 160.26 ± 9.83 | 165.52 ± 11.62     | 142.31 ± 8.57                  | 139.61 ± 11.14                 | 147.94 ± 12.55      |

**Supplementary Table 6 (continued)**

**C 4 h in the dark (relative)**

| Amino acid                 | Ws-2           | <i>xpt-1</i>  | <i>tpt-1</i>  | <i>tpt-1/xpt-1</i> | Col-0         | <i>tpt-2</i>  | <i>tpt-2/xpt-1</i> | amiRNA:<br>XPT <i>tpt-2</i> #3 | amiRNA:<br>XPT <i>tpt-2</i> #4 | <i>adg1-1/tpt-2</i> |
|----------------------------|----------------|---------------|---------------|--------------------|---------------|---------------|--------------------|--------------------------------|--------------------------------|---------------------|
| mol-% of $\Sigma$          |                |               |               |                    |               |               |                    |                                |                                |                     |
| <b>Glu</b>                 | 5.35 ± 0.30    | 5.62 ± 0.50   | 9.53 ± 0.39   | 15.70 ± 1.08       | 4.49 ± 0.45   | 9.33 ± 1.08   | 9.14 ± 0.71        | 9.40 ± 0.78                    | 8.56 ± 0.78                    | 10.01 ± 0.92        |
| <b>Gln</b>                 | 53.79 ± 4.91   | 47.09 ± 1.68  | 57.61 ± 2.96  | 43.97 ± .21        | 58.06 ± 2.38  | 54.23 ± 4.09  | 44.40 ± 4.39       | 57.54 ± 3.77                   | 57.64 ± 5.73                   | 27.18 ± 1.65        |
| <b>Asp</b>                 | 1.03 ± 0.07    | 1.21 ± 0.17   | 1.52 ± 0.10   | 3.30 ± 0.29        | 0.81 ± 0.06   | 1.24 ± 0.12   | 1.33 ± 0.18        | 1.52 ± 0.19                    | 1.20 ± 0.11                    | 2.73 ± 0.22         |
| <b>Asn</b>                 | 7.04 ± 0.79    | 6.55 ± 0.42   | 6.28 ± 0.56   | 6.98 ± 0.16        | 3.37 ± 0.23   | 4.32 ± 0.50   | 5.11 ± 4.01        | 4.94 ± 0.33                    | 4.61 ± 0.50                    | 26.03 ± 1.53        |
| <b>Ala</b>                 | 6.53 ± 0.95    | 5.80 ± 0.63   | 6.58 ± 0.17   | 6.64 ± 0.29        | 2.88 ± 0.34   | 5.54 ± 0.36   | 14.89 ± 2.84       | 5.78 ± 0.38                    | 6.57 ± 0.44                    | 3.76 ± 0.56         |
| <b>Ser</b>                 | 9.30 ± 1.02    | 13.52 ± 0.94  | 10.33 ± 0.39  | 12.41 ± 0.79       | 16.78 ± 0.86  | 14.46 ± 3.27  | 12.15 ± 1.31       | 10.44 ± 1.11                   | 10.95 ± 1.00                   | 8.61 ± 0.69         |
| <b>Gly</b>                 | 11.32 ± 5.43   | 14.84 ± 3.03  | 0.99 ± 0.11   | 0.91 ± 0.07        | 1.93 ± 0.73   | 1.25 ± 0.16   | 1.04 ± 0.09        | 0.93 ± 0.13                    | 0.85 ± 0.07                    | 0.81 ± 0.04         |
| <b>Thr</b>                 | 1.40 ± 0.08    | 1.73 ± 0.26   | 1.57 ± 0.15   | 3.73 ± 0.24        | 2.34 ± 0.30   | 3.16 ± 0.21   | 4.07 ± 0.42        | 2.94 ± 0.15                    | 3.18 ± 0.33                    | 5.98 ± 0.64         |
| <b>His</b>                 | 0.69 ± 0.09    | 0.61 ± 0.07   | 0.67 ± 0.03   | 0.69 ± 0.04        | 0.49 ± 0.06   | 0.68 ± 0.05   | 0.60 ± 0.04        | 0.74 ± 0.06                    | 0.71 ± 0.06                    | 0.99 ± 0.03         |
| <b>Arg</b>                 | 1.05 ± 0.15    | 0.83 ± 0.10   | 0.61 ± 0.07   | 0.99 ± 0.09        | 6.42 ± 1.19   | 1.84 ± 0.36   | 2.36 ± 0.71        | 1.04 ± 0.13                    | 1.20 ± 0.14                    | 5.87 ± 0.41         |
| <b>Phe</b>                 | 0.39 ± 0.04    | 0.35 ± 0.03   | 0.65 ± 0.03   | 0.70 ± 0.05        | 0.27 ± 0.02   | 0.50 ± 0.03   | 0.66 ± 0.03        | 0.61 ± 0.04                    | 0.58 ± 0.07                    | 0.74 ± 0.05         |
| <b>Tyr</b>                 | 0.20 ± 0.02    | 0.17 ± 0.02   | 0.38 ± 0.02   | 0.47 ± 0.04        | 0.15 ± 0.01   | 0.31 ± 0.02   | 0.33 ± 0.03        | 0.35 ± 0.03                    | 0.29 ± 0.03                    | 0.59 ± 0.03         |
| <b>Trp</b>                 | 0.19 ± 0.01    | 0.18 ± 0.02   | 0.36 ± 0.02   | 0.42 ± 0.03        | 0.16 ± 0.01   | 0.34 ± 0.02   | 0.35 ± 0.02        | 0.40 ± 0.04                    | 0.33 ± 0.03                    | 0.52 ± 0.04         |
| <b>Val</b>                 | 0.98 ± 0.04    | 0.84 ± 0.08   | 1.51 ± 0.06   | 1.48 ± 0.07        | 0.74 ± 0.02   | 1.25 ± 0.05   | 1.50 ± 0.13        | 1.42 ± 0.07                    | 1.49 ± 0.11                    | 2.37 ± 0.10         |
| <b>Leu</b>                 | 0.25 ± 0.01    | 0.23 ± 0.03   | 0.50 ± 0.02   | 0.51 ± 0.03        | 0.45 ± 0.01   | 0.80 ± 0.08   | 1.12 ± 0.07        | 1.07 ± 0.04                    | 1.07 ± 0.12                    | 1.61 ± 0.05         |
| <b>Ile</b>                 | 0.26 ± 0.02    | 0.24 ± 0.03   | 0.46 ± 0.03   | 0.57 ± 0.04        | 0.26 ± 0.01   | 0.35 ± 0.01   | 0.48 ± 0.09        | 0.41 ± 0.03                    | 0.37 ± 0.03                    | 1.00 ± 0.02         |
| <b>Lys</b>                 | 0.24 ± 0.02    | 0.20 ± 0.03   | 0.46 ± 0.03   | 0.54 ± 0.04        | 0.41 ± 0.11   | 0.40 ± 0.02   | 0.47 ± 0.13        | 0.47 ± 0.05                    | 0.39 ± 0.04                    | 1.18 ± 0.15         |
| <b><math>\Sigma</math></b> | 100.00 ± 12.52 | 100.00 ± 6.91 | 100.00 ± 4.65 | 100.00 ± 2.34      | 100.00 ± 2.71 | 100.00 ± 4.95 | 100.00 ± 4.57      | 100.00 ± 6.44                  | 100.00 ± 8.79                  | 100.00 ± 4.97       |

## Supplementary Table 6 (continued)

### D 8 h in the light (relative)

| Amino acid        | Ws-2          | <i>xpt-1</i>  | <i>tpt-1</i>  | <i>tpt-1/xpt-1</i> | Col-0         | <i>tpt-2</i>  | <i>tpt-2/xpt-1</i> | amiRNA:<br>XPT <i>tpt-2</i> #3 | amiRNA:<br>XPT <i>tpt-2</i> #4 | <i>adg1-1/tpt-2</i> |
|-------------------|---------------|---------------|---------------|--------------------|---------------|---------------|--------------------|--------------------------------|--------------------------------|---------------------|
| mol-% of $\Sigma$ |               |               |               |                    |               |               |                    |                                |                                |                     |
| <b>Glu</b>        | 8.15 ± 1.13   | 9.20 ± 0.56   | 12.73 ± 1.12  | 16.02 ± 2.03       | 9.58 ± 16     | 12.88 ± 1.21  | 13.39 ± 1.65       | 12.92 ± 0.66                   | 13.39 ± 1.35                   | 14.45 ± 1.16        |
| <b>Gln</b>        | 39.54 ± 4.00  | 36.18 ± 45    | 33.84 ± 2.13  | 28.68 ± 4.72       | 44.52 ± 0.56  | 28.50 ± 1.75  | 30.77 ± 2.97       | 37.70 ± 3.26                   | 38.22 ± 3.17                   | 14.97 ± 1.78        |
| <b>Asp</b>        | 1.30 ± 0.23   | 1.94 ± 0.30   | 2.38 ± 0.24   | 4.42 ± 0.57        | 0.66 ± 0.18   | 1.30 ± 0.16   | 2.51 ± 0.36        | 1.82 ± 0.14                    | 1.93 ± 0.24                    | 2.16 ± 0.27         |
| <b>Asn</b>        | 6.42 ± 0.79   | 6.14 ± 0.31   | 6.67 ± 0.38   | 7.37 ± 1.04        | 3.48 ± 0.60   | 3.70 ± 0.54   | 5.07 ± 0.33        | 5.08 ± 0.32                    | 5.07 ± 0.44                    | 21.83 ± 2.15        |
| <b>Ala</b>        | 7.55 ± 0.46   | 7.36 ± 0.30   | 5.92 ± 0.23   | 7.72 ± 1.90        | 2.20 ± 0.77   | 2.95 ± 0.30   | 16.85 ± 3.02       | 6.49 ± 0.50                    | 6.37 ± 0.55                    | 9.36 ± 0.61         |
| <b>Ser</b>        | 10.50 ± 1.01  | 11.63 ± 0.61  | 19.27 ± 1.30  | 20.57 ± 2.12       | 22.52 ± 2.21  | 30.13 ± 3.74  | 14.95 ± 0.71       | 18.68 ± 0.56                   | 17.74 ± 1.20                   | 14.01 ± 1.34        |
| <b>Gly</b>        | 20.56 ± 1.57  | 21.30 ± 1.37  | 11.16 ± 1.17  | 4.29 ± 0.84        | 8.15 ± 2.31   | 9.61 ± 0.56   | 3.10 ± 0.18        | 5.96 ± 0.82                    | 6.31 ± 0.80                    | 1.79 ± 0.19         |
| <b>Thr</b>        | 1.76 ± 0.14   | 2.31 ± 0.10   | 2.54 ± 0.11   | 4.28 ± 0.33        | 2.67 ± 0.18   | 4.53 ± 0.32   | 4.37 ± 0.18        | 4.45 ± 0.19                    | 4.29 ± 0.22                    | 6.12 ± 0.69         |
| <b>His</b>        | 0.40 ± 0.10   | 0.50 ± 0.17   | 0.56 ± 0.10   | 0.57 ± 0.07        | 0.63 ± 0.09   | 0.76 ± 0.06   | 0.74 ± 0.04        | 0.82 ± 0.04                    | 0.83 ± 0.06                    | 0.88 ± 0.03         |
| <b>Arg</b>        | 1.32 ± 0.17   | 0.90 ± 0.16   | 0.99 ± 0.08   | 1.39 ± 0.25        | 3.46 ± 1.20   | 2.26 ± 0.56   | 2.89 ± 0.52        | 1.97 ± 0.11                    | 1.83 ± 0.10                    | 8.93 ± 1.95         |
| <b>Phe</b>        | 0.43 ± 0.04   | 0.42 ± 0.03   | 0.59 ± 0.05   | 0.69 ± 0.06        | 0.28 ± 0.06   | 0.51 ± 0.05   | 0.70 ± 0.03        | 0.61 ± 0.03                    | 0.61 ± 0.06                    | 0.59 ± 0.05         |
| <b>Tyr</b>        | 0.23 ± 0.03   | 0.22 ± 0.02   | 0.41 ± 0.05   | 0.48 ± 0.04        | 0.17 ± 02     | 0.28 ± 0.02   | 0.37 ± 0.02        | 0.31 ± 0.02                    | 0.30 ± 0.03                    | 0.47 ± 0.02         |
| <b>Trp</b>        | 0.20 ± 0.02   | 0.19 ± 0.02   | 0.35 ± 0.04   | 0.46 ± 0.06        | 0.23 ± 0.06   | 0.28 ± 0.02   | 0.38 ± 0.03        | 0.33 ± 0.02                    | 0.32 ± 0.03                    | 0.43 ± 0.04         |
| <b>Val</b>        | 0.79 ± 0.06   | 0.86 ± 0.03   | 1.14 ± 0.07   | 1.32 ± 0.13        | 0.48 ± 0.12   | 0.94 ± 0.07   | 1.59 ± 0.11        | 1.21 ± 0.07                    | 1.21 ± 0.09                    | 1.57 ± 0.09         |
| <b>Leu</b>        | 0.24 ± 0.03   | 0.24 ± 0.01   | 0.38 ± 0.04   | 0.45 ± 0.04        | 0.45 ± 0.08   | 0.58 ± 0.05   | 1.21 ± 0.08        | 0.74 ± 0.05                    | 0.73 ± 0.05                    | 0.82 ± 0.06         |
| <b>Ile</b>        | 0.34 ± 0.04   | 0.34 ± 0.03   | 0.57 ± 0.06   | 0.68 ± 0.05        | 0.28 ± 0.03   | 0.44 ± 0.02   | 0.59 ± 0.02        | 0.48 ± 0.02                    | 0.47 ± 0.03                    | 0.59 ± 0.04         |
| <b>Lys</b>        | 0.28 ± 0.04   | 0.26 ± 0.02   | 0.51 ± 0.06   | 0.61 ± 0.05        | 0.27 ± 0.06   | 0.37 ± 0.03   | 0.53 ± 0.03        | 0.44 ± 0.03                    | 0.39 ± 0.02                    | 1.05 ± 0.03         |
| $\Sigma$          | 100.00 ± 8.39 | 100.00 ± 4.39 | 100.00 ± 5.94 | 100.00 ± 12.55     | 100.00 ± 3.75 | 100.00 ± 6.14 | 100.00 ± 7.02      | 100.00 ± 6.02                  | 100.00 ± 7.98                  | 100.00 ± 8.48       |

The plants were grown in soil under HL-conditions (PDF = 300  $\mu\text{mol}\cdot\text{m}^{-2}\cdot\text{s}^{-1}$ ) in the long-day. Samples were taken either 4h in the dark (**A**, **C**) or 8h in the light (**B**, **D**). The absolute values are shown in (**A**) and (**C**), and the relative values (expressed as percent of  $\Sigma$  amino acids) in (**D**) and (**E**). The data represents the mean  $\pm$  SE of n = 4 to 5 independent replicates.
