# Supplementary material for: The Combined Loss of Triose Phosphate and Xylulose 5-Phosphate/Phosphate Translocators Leads to Severe Growth Retardation and Impaired Photosynthesis in Arabidopsis thaliana tpt/xpt Double Mutants
Source: PubMed Central journal article supplement (PMC6175978; doi:10.3389/fpls.2018.01331), 2018-10-02
Supplement: Data_Sheet_4.pdf [file Data_Sheet_4.pdf]

## **Supplementary Document 2**

Statistical analyses



**Doc S2 Table 2. Statistical analysis (ANOVA/Tukey-Kramer) of Chl *a* fluorescence parameters of wild-type and mutant plants impaired in XPT and TPT as well as starch biosynthesis.** The growth conditions and experimental setup is described in Supplementary Table 2. The biotypes are denoted, *a* = *Ws-2*, *b* = *Col-0*, *c* = *tpt-2*, *d* = *tpt-2/xpt-1*, *e* = *amiRNA:XPT tpt-2 #3*, *f* = *amiRNA:XPT tpt-2 #4*, *g* = *adg1-1/tpt-2*, *h* = *xpt-1*, *i* = *tpt-1*, and *j* = *tpt-1/xpt-1*. The significance levels of  $P < 0.05$  or  $P < 0.01$  are indicated by light or dark blue colors.

### 7 Comparisons

| PS Parameters          | <i>b</i> vs <i>a</i> | <i>c</i> vs <i>a</i> | <i>d</i> vs <i>a</i> | <i>e</i> vs <i>a</i> | <i>f</i> vs <i>a</i> | <i>g</i> vs <i>a</i> | <i>c</i> vs <i>b</i> | <i>d</i> vs <i>b</i> | <i>e</i> vs <i>b</i> | <i>f</i> vs <i>b</i> | <i>g</i> vs <i>b</i> | <i>d</i> vs <i>c</i> | <i>e</i> vs <i>c</i> | <i>f</i> vs <i>c</i> | <i>g</i> vs <i>c</i> | <i>e</i> vs <i>d</i> | <i>f</i> vs <i>d</i> | <i>g</i> vs <i>d</i> | <i>f</i> vs <i>e</i> | <i>g</i> vs <i>e</i> | <i>f</i> vs <i>g</i> |           |
|------------------------|----------------------|----------------------|----------------------|----------------------|----------------------|----------------------|----------------------|----------------------|----------------------|----------------------|----------------------|----------------------|----------------------|----------------------|----------------------|----------------------|----------------------|----------------------|----------------------|----------------------|----------------------|-----------|
| Long-day HL            |                      |                      |                      |                      |                      |                      |                      |                      |                      |                      |                      |                      |                      |                      |                      |                      |                      |                      |                      |                      |                      |           |
| $F_v/F_m$              |                      |                      | Dark Blue            |                      | Light Blue           | Dark Blue            |                      | Dark Blue            |                      | Light Blue           | Dark Blue            | Dark Blue            |                      |                      | Dark Blue            | Dark Blue            | Dark Blue            | Dark Blue            |                      |                      | Dark Blue            | Dark Blue |
| $\Phi_{PSII}$          |                      |                      | Dark Blue            |                      | Dark Blue            | Dark Blue            |                      | Dark Blue            |                      | Dark Blue            | Dark Blue            | Dark Blue            |                      |                      | Dark Blue            | Dark Blue            | Dark Blue            | Dark Blue            |                      | Dark Blue            | Dark Blue            | Dark Blue |
| Relative $ETR_{(700)}$ |                      |                      | Dark Blue            |                      | Dark Blue            | Dark Blue            |                      | Dark Blue            |                      | Dark Blue            | Dark Blue            | Dark Blue            |                      |                      | Dark Blue            | Dark Blue            | Dark Blue            | Dark Blue            |                      | Dark Blue            | Dark Blue            | Dark Blue |

### 4 Comparisons

| <i>h</i> vs <i>a</i> | <i>i</i> vs <i>a</i> | <i>j</i> vs <i>a</i> | <i>i</i> vs <i>h</i> | <i>j</i> vs <i>h</i> | <i>i</i> vs <i>j</i> |
|----------------------|----------------------|----------------------|----------------------|----------------------|----------------------|
| Long-day HL          |                      |                      |                      |                      |                      |
|                      |                      | Dark Blue            | Light Blue           | Dark Blue            | Dark Blue            |
|                      | Light Blue           | Dark Blue            | Light Blue           | Dark Blue            | Dark Blue            |
|                      | Dark Blue            | Dark Blue            | Dark Blue            | Dark Blue            | Dark Blue            |

**Doc S2 Table 3. Statistical analysis (ANOVA/Tukey-Kramer) of rosette leaf parameters, i.e. photosynthetic pigments and protein contents as well as specific fresh weights.** Plants were grown under HL- (PFD = 300  $\mu\text{mol}\cdot\text{m}^{-2}\cdot\text{s}^{-1}$ ; Tabel 3, main article) or LL-conditions (PFD = 30  $\mu\text{mol}\cdot\text{m}^{-2}\cdot\text{s}^{-1}$ ; Supplementary Table 3). The biotypes are denoted, **a** = Ws-2, **b** = Col-0, **c** = *tpt-2*, **d** = *tpt-2/xpt-1*, **e** = amiRNA:*XPT tpt-2* #3, **f** = amiRNA:*XPT tpt-2* #4, **g** = *adg1-1/tpt-2*, **h** = *xpt-1*, **i** = *tpt-1*, and **j** = *tpt-1/xpt-1*. The significance levels of  $P < 0.05$  or  $P < 0.01$  are indicated by light or dark blue colors.

### 7 Comparisons

| Parameters          | <i>b</i> vs <i>a</i> | <i>c</i> vs <i>a</i> | <i>d</i> vs <i>a</i> | <i>e</i> vs <i>a</i> | <i>f</i> vs <i>a</i> | <i>g</i> vs <i>a</i> | <i>c</i> vs <i>b</i> | <i>d</i> vs <i>b</i> | <i>e</i> vs <i>b</i> | <i>f</i> vs <i>b</i> | <i>g</i> vs <i>b</i> | <i>d</i> vs <i>c</i> | <i>e</i> vs <i>c</i> | <i>f</i> vs <i>c</i> | <i>g</i> vs <i>c</i> | <i>e</i> vs <i>d</i> | <i>f</i> vs <i>d</i> | <i>g</i> vs <i>d</i> | <i>f</i> vs <i>e</i> | <i>g</i> vs <i>e</i> | <i>g</i> vs <i>f</i> |
|---------------------|----------------------|----------------------|----------------------|----------------------|----------------------|----------------------|----------------------|----------------------|----------------------|----------------------|----------------------|----------------------|----------------------|----------------------|----------------------|----------------------|----------------------|----------------------|----------------------|----------------------|----------------------|
| <b>A High light</b> |                      |                      |                      |                      |                      |                      |                      |                      |                      |                      |                      |                      |                      |                      |                      |                      |                      |                      |                      |                      |                      |
| Chl                 |                      |                      | Dark Blue            | Dark Blue            | Dark Blue            | Dark Blue            | Light Blue           | Dark Blue            | Dark Blue            | Dark Blue            | Dark Blue            | Dark Blue            | Dark Blue            | Light Blue           | Dark Blue            |                      |                      |                      |                      | Light Blue           | Dark Blue            |
| Carotenoids         |                      |                      | Light Blue           |                      |                      | Dark Blue            |                      |                      |                      |                      | Dark Blue            | Dark Blue            |                      |                      | Dark Blue            |                      |                      |                      |                      |                      |                      |
| Chl a/b-ratio       |                      |                      | Dark Blue            | Dark Blue            | Dark Blue            | Dark Blue            |                      | Dark Blue            | Light Blue           |                      | Dark Blue            | Dark Blue            | Dark Blue            |                      | Dark Blue            |                      |                      | Dark Blue            |                      | Light Blue           | Dark Blue            |
| Protein             |                      | Light Blue           | Dark Blue            | Dark Blue            | Dark Blue            | Dark Blue            |                      | Dark Blue            | Light Blue           |                      | Dark Blue            | Dark Blue            |                      |                      | Dark Blue            |                      |                      |                      |                      |                      |                      |
| Spec. fw            | Light Blue           |                      | Dark Blue            | Dark Blue            | Dark Blue            | Dark Blue            | Dark Blue            | Dark Blue            | Dark Blue            | Dark Blue            | Dark Blue            | Dark Blue            | Dark Blue            | Dark Blue            | Dark Blue            |                      |                      | Light Blue           |                      |                      |                      |
| <b>B Low light</b>  |                      |                      |                      |                      |                      |                      |                      |                      |                      |                      |                      |                      |                      |                      |                      |                      |                      |                      |                      |                      |                      |
| Chl                 |                      |                      |                      |                      |                      | Dark Blue            |                      |                      |                      |                      | Dark Blue            |                      |                      |                      | Dark Blue            |                      |                      |                      |                      | Dark Blue            | Light Blue           |
| Carotenoids         |                      |                      |                      |                      |                      |                      |                      |                      |                      |                      |                      |                      |                      |                      |                      |                      |                      |                      |                      |                      |                      |
| Chl a/b-ratio       |                      |                      |                      |                      |                      | Dark Blue            |                      |                      |                      |                      | Dark Blue            |                      |                      |                      | Dark Blue            | Light Blue           |                      | Dark Blue            |                      | Dark Blue            | Dark Blue            |
| Protein             |                      |                      |                      |                      |                      |                      |                      |                      |                      |                      |                      |                      |                      |                      |                      |                      |                      |                      |                      |                      |                      |
| Spec. fw            |                      |                      |                      |                      |                      |                      |                      |                      |                      |                      |                      |                      |                      |                      |                      |                      |                      |                      |                      |                      |                      |

### 4 Comparisons

| Parameters          | <i>h</i> vs <i>a</i> | <i>i</i> vs <i>a</i> | <i>j</i> vs <i>a</i> | <i>i</i> vs <i>h</i> | <i>j</i> vs <i>h</i> | <i>j</i> vs <i>i</i> |
|---------------------|----------------------|----------------------|----------------------|----------------------|----------------------|----------------------|
| <b>A High light</b> |                      |                      |                      |                      |                      |                      |
| Chl                 |                      | Light Blue           | Dark Blue            | Dark Blue            | Dark Blue            | Light Blue           |
| Carotenoids         |                      |                      |                      |                      |                      |                      |
| Chl a/b-ratio       |                      |                      |                      |                      |                      |                      |
| Protein             |                      |                      | Dark Blue            |                      | Dark Blue            |                      |
| Spec. fw            | Light Blue           | Light Blue           | Dark Blue            | Dark Blue            | Dark Blue            |                      |
| <b>B Low light</b>  |                      |                      |                      |                      |                      |                      |
| Chl                 |                      |                      |                      |                      |                      |                      |
| Carotenoids         |                      |                      |                      |                      |                      |                      |
| Chl a/b-ratio       |                      |                      |                      |                      |                      |                      |
| Protein             |                      |                      |                      |                      |                      |                      |
| Spec. fw            | Light Blue           |                      |                      | Light Blue           |                      |                      |

**Doc S2 Table 4. Statistical analysis (ANOVA/Tukey-Kramer) of carbohydrate contents in rosette leaves of wild-type and mutant plants.** The plants were grown in soil under HL-conditions (PFD = 300  $\mu\text{mol}\cdot\text{m}^{-2}\cdot\text{s}^{-1}$ ) in the long-day (Figure 4, main article). The biotypes are denoted, **a** = *Ws-2*, **b** = *xpt-1*, **c** = *tpt-1*, **d** = *tpt-1/xpt-1*, **e** = *Col-0*, **f** = *tpt-2*, **g** = *tpt-2/xpt-1*, and **h** = *adg1-1/tpt-2*. The significance levels of  $P < 0.05$  or  $P < 0.01$  are indicated by light or dark blue colors.

### 8 Comparisons

| Time course                         | <i>b</i> vs <i>a</i> | <i>c</i> vs <i>a</i> | <i>d</i> vs <i>a</i> | <i>e</i> vs <i>a</i> | <i>f</i> vs <i>a</i> | <i>g</i> vs <i>a</i> | <i>h</i> vs <i>a</i> | <i>c</i> vs <i>b</i> | <i>d</i> vs <i>b</i> | <i>e</i> vs <i>b</i> | <i>f</i> vs <i>b</i> | <i>g</i> vs <i>b</i> | <i>h</i> vs <i>b</i> | <i>d</i> vs <i>c</i> | <i>e</i> vs <i>c</i> | <i>f</i> vs <i>c</i> | <i>g</i> vs <i>c</i> | <i>h</i> vs <i>c</i> | <i>e</i> vs <i>d</i> | <i>f</i> vs <i>d</i> | <i>g</i> vs <i>d</i> | <i>h</i> vs <i>d</i> | <i>f</i> vs <i>e</i> | <i>g</i> vs <i>e</i> | <i>h</i> vs <i>e</i> | <i>g</i> vs <i>f</i> | <i>h</i> vs <i>f</i> | <i>h</i> vs <i>g</i> |
|-------------------------------------|----------------------|----------------------|----------------------|----------------------|----------------------|----------------------|----------------------|----------------------|----------------------|----------------------|----------------------|----------------------|----------------------|----------------------|----------------------|----------------------|----------------------|----------------------|----------------------|----------------------|----------------------|----------------------|----------------------|----------------------|----------------------|----------------------|----------------------|----------------------|
| <b>A Starch</b>                     |                      |                      |                      |                      |                      |                      |                      |                      |                      |                      |                      |                      |                      |                      |                      |                      |                      |                      |                      |                      |                      |                      |                      |                      |                      |                      |                      |                      |
| 1 h                                 |                      | Dark Blue            | Dark Blue            |                      | Dark Blue            | Light Blue           | Dark Blue            | Dark Blue            | Light Blue           |                      | Dark Blue            |                      | Dark Blue            |                      | Light Blue           |                      |                      | Dark Blue            | Dark Blue            |                      |                      | Dark Blue            |                      |                      | Dark Blue            | Light Blue           | Dark Blue            | Dark Blue            |
| 4 h                                 |                      | Dark Blue            |                      |                      | Dark Blue            | Dark Blue            | Dark Blue            | Dark Blue            |                      |                      | Dark Blue            |                      | Dark Blue            | Dark Blue            | Dark Blue            |                      | Dark Blue            | Dark Blue            |                      | Dark Blue            |                      | Dark Blue            | Dark Blue            |                      | Dark Blue            | Dark Blue            | Dark Blue            | Dark Blue            |
| 8 h                                 |                      | Dark Blue            | Dark Blue            |                      | Dark Blue            | Light Blue           | Dark Blue            | Dark Blue            |                      |                      | Dark Blue            |                      | Dark Blue            | Dark Blue            | Dark Blue            |                      | Dark Blue            | Dark Blue            |                      | Dark Blue            |                      | Dark Blue            | Dark Blue            |                      | Dark Blue            | Dark Blue            | Dark Blue            | Dark Blue            |
| 12 h                                |                      | Dark Blue            |                      |                      | Light Blue           |                      | Dark Blue            | Dark Blue            |                      |                      |                      |                      | Dark Blue            | Dark Blue            | Dark Blue            |                      | Dark Blue            | Dark Blue            |                      |                      |                      | Dark Blue            | Dark Blue            |                      | Dark Blue            | Dark Blue            | Dark Blue            | Dark Blue            |
| 15 h                                |                      | Dark Blue            | Dark Blue            |                      | Dark Blue            |                      | Dark Blue            | Dark Blue            | Dark Blue            |                      | Dark Blue            |                      | Dark Blue            | Dark Blue            | Dark Blue            |                      | Dark Blue            | Dark Blue            | Dark Blue            | Dark Blue            |                      | Light Blue           | Dark Blue            |                      | Dark Blue            | Dark Blue            | Dark Blue            | Dark Blue            |
| 17 h                                |                      | Dark Blue            |                      |                      | Dark Blue            |                      | Dark Blue            | Dark Blue            | Dark Blue            |                      | Dark Blue            |                      | Dark Blue            | Dark Blue            | Dark Blue            |                      | Dark Blue            | Dark Blue            |                      | Dark Blue            |                      | Dark Blue            | Dark Blue            |                      | Dark Blue            | Dark Blue            | Dark Blue            | Dark Blue            |
| 20 h                                |                      | Dark Blue            | Dark Blue            |                      | Dark Blue            | Dark Blue            | Dark Blue            | Dark Blue            | Dark Blue            |                      | Dark Blue            | Dark Blue            | Dark Blue            | Dark Blue            | Dark Blue            |                      | Dark Blue            | Dark Blue            | Dark Blue            | Dark Blue            |                      |                      | Dark Blue            | Dark Blue            | Dark Blue            | Dark Blue            | Dark Blue            | Dark Blue            |
| 23 h                                |                      | Dark Blue            |                      |                      | Dark Blue            |                      | Dark Blue            | Dark Blue            |                      |                      | Dark Blue            |                      | Dark Blue            | Dark Blue            | Dark Blue            |                      | Dark Blue            | Dark Blue            |                      | Light Blue           |                      | Dark Blue            | Dark Blue            |                      | Dark Blue            | Dark Blue            | Light Blue           | Dark Blue            |
| <b>B <math>\Sigma</math> Sugars</b> |                      |                      |                      |                      |                      |                      |                      |                      |                      |                      |                      |                      |                      |                      |                      |                      |                      |                      |                      |                      |                      |                      |                      |                      |                      |                      |                      |                      |
| 1 h                                 |                      |                      |                      |                      |                      | Light Blue           |                      | Dark Blue            |                      |                      |                      |                      |                      |                      | Dark Blue            |                      | Dark Blue            |                      |                      |                      | Light Blue           |                      |                      |                      |                      | Dark Blue            |                      | Dark Blue            |
| 4 h                                 |                      | Dark Blue            | Light Blue           |                      | Light Blue           | Dark Blue            |                      | Dark Blue            | Dark Blue            |                      | Dark Blue            |                      |                      |                      | Dark Blue            |                      | Dark Blue            |                      | Dark Blue            |                      | Dark Blue            |                      | Dark Blue            |                      | Dark Blue            |                      | Dark Blue            | Dark Blue            |
| 8 h                                 |                      |                      |                      |                      |                      |                      |                      |                      |                      |                      |                      |                      |                      |                      | Light Blue           |                      | Dark Blue            |                      |                      |                      | Light Blue           |                      |                      |                      |                      |                      |                      |                      |
| 12 h                                |                      | Dark Blue            | Dark Blue            |                      | Light Blue           |                      | Dark Blue            | Dark Blue            | Dark Blue            |                      | Dark Blue            |                      |                      |                      | Dark Blue            |                      | Dark Blue            |                      | Dark Blue            |                      | Dark Blue            |                      | Dark Blue            |                      | Dark Blue            | Dark Blue            | Dark Blue            | Dark Blue            |
| 15 h                                |                      | Dark Blue            | Dark Blue            |                      | Dark Blue            |                      | Dark Blue            | Dark Blue            | Dark Blue            |                      | Light Blue           |                      | Dark Blue            |                      | Dark Blue            |                      | Dark Blue            | Dark Blue            | Dark Blue            | Dark Blue            |                      |                      | Light Blue           |                      | Dark Blue            | Dark Blue            | Dark Blue            | Dark Blue            |
| 17 h                                |                      |                      |                      |                      | Dark Blue            | Dark Blue            | Dark Blue            | Dark Blue            | Dark Blue            |                      | Dark Blue            | Dark Blue            | Dark Blue            |                      | Light Blue           |                      | Dark Blue            | Dark Blue            | Dark Blue            | Dark Blue            |                      | Dark Blue            | Dark Blue            | Light Blue           | Dark Blue            | Dark Blue            | Dark Blue            | Dark Blue            |
| 20 h                                |                      |                      |                      | Dark Blue            | Dark Blue            | Dark Blue            | Dark Blue            | Dark Blue            | Dark Blue            |                      | Dark Blue            | Dark Blue            | Dark Blue            |                      | Dark Blue            | Light Blue           | Dark Blue            | Dark Blue            | Dark Blue            | Dark Blue            |                      | Dark Blue            | Dark Blue            |                      | Dark Blue            | Dark Blue            | Dark Blue            | Dark Blue            |
| 23 h                                |                      |                      | Light Blue           |                      |                      | Dark Blue            | Dark Blue            |                      |                      |                      |                      | Dark Blue            | Dark Blue            | Light Blue           |                      |                      | Dark Blue            | Dark Blue            | Dark Blue            | Dark Blue            |                      | Light Blue           | Dark Blue            |                      | Dark Blue            | Dark Blue            | Dark Blue            | Dark Blue            |

Doc S2 Table4 (continued)

| Time course  | <i>b vs a</i> | <i>c vs a</i> | <i>d vs a</i> | <i>e vs a</i> | <i>f vs a</i> | <i>g vs a</i> | <i>h vs a</i> | <i>c vs b</i> | <i>d vs b</i> | <i>e vs b</i> | <i>f vs b</i> | <i>g vs b</i> | <i>h vs b</i> | <i>d vs c</i> | <i>e vs c</i> | <i>f vs c</i> | <i>g vs c</i> | <i>h vs c</i> | <i>e vs d</i> | <i>f vs d</i> | <i>g vs d</i> | <i>h vs d</i> | <i>f vs e</i> | <i>g vs e</i> | <i>h vs e</i> | <i>g vs f</i> | <i>h vs f</i> | <i>h vs g</i> |  |
|--------------|---------------|---------------|---------------|---------------|---------------|---------------|---------------|---------------|---------------|---------------|---------------|---------------|---------------|---------------|---------------|---------------|---------------|---------------|---------------|---------------|---------------|---------------|---------------|---------------|---------------|---------------|---------------|---------------|--|
| <b>C Glc</b> |               |               |               |               |               |               |               |               |               |               |               |               |               |               |               |               |               |               |               |               |               |               |               |               |               |               |               |               |  |
| 1 h          |               |               |               |               |               |               |               |               |               |               |               |               |               |               |               |               |               |               |               |               |               |               |               |               |               |               |               |               |  |
| 4 h          |               |               |               |               |               |               |               |               |               |               |               |               |               |               |               |               |               |               |               |               |               |               |               |               |               |               |               |               |  |
| 8 h          |               |               |               |               |               |               |               |               |               |               |               |               |               |               |               |               |               |               |               |               |               |               |               |               |               |               |               |               |  |
| 12 h         |               |               |               |               |               |               |               |               |               |               |               |               |               |               |               |               |               |               |               |               |               |               |               |               |               |               |               |               |  |
| 15 h         |               |               |               |               |               |               |               |               |               |               |               |               |               |               |               |               |               |               |               |               |               |               |               |               |               |               |               |               |  |
| 17 h         |               |               |               |               |               |               |               |               |               |               |               |               |               |               |               |               |               |               |               |               |               |               |               |               |               |               |               |               |  |
| 20 h         |               |               |               |               |               |               |               |               |               |               |               |               |               |               |               |               |               |               |               |               |               |               |               |               |               |               |               |               |  |
| 23 h         |               |               |               |               |               |               |               |               |               |               |               |               |               |               |               |               |               |               |               |               |               |               |               |               |               |               |               |               |  |
| <b>D Fru</b> |               |               |               |               |               |               |               |               |               |               |               |               |               |               |               |               |               |               |               |               |               |               |               |               |               |               |               |               |  |
| 1 h          |               |               |               |               |               |               |               |               |               |               |               |               |               |               |               |               |               |               |               |               |               |               |               |               |               |               |               |               |  |
| 4 h          |               |               |               |               |               |               |               |               |               |               |               |               |               |               |               |               |               |               |               |               |               |               |               |               |               |               |               |               |  |
| 8 h          |               |               |               |               |               |               |               |               |               |               |               |               |               |               |               |               |               |               |               |               |               |               |               |               |               |               |               |               |  |
| 12 h         |               |               |               |               |               |               |               |               |               |               |               |               |               |               |               |               |               |               |               |               |               |               |               |               |               |               |               |               |  |
| 15 h         |               |               |               |               |               |               |               |               |               |               |               |               |               |               |               |               |               |               |               |               |               |               |               |               |               |               |               |               |  |
| 17 h         |               |               |               |               |               |               |               |               |               |               |               |               |               |               |               |               |               |               |               |               |               |               |               |               |               |               |               |               |  |
| 20 h         |               |               |               |               |               |               |               |               |               |               |               |               |               |               |               |               |               |               |               |               |               |               |               |               |               |               |               |               |  |
| 23 h         |               |               |               |               |               |               |               |               |               |               |               |               |               |               |               |               |               |               |               |               |               |               |               |               |               |               |               |               |  |

*a* = Ws-2, *b* = *xpt-1*, *c* = *tpt-1*, *d* = *tpt-1/xpt-1*, *e* = Col-0, *f* = *tpt-2*, *g* = *tpt-2/xpt-1*, and *h* = *adg1-1/tpt-2*

Doc S2 Table4 (continued)

| Time course | <i>b</i> vs <i>a</i> | <i>c</i> vs <i>a</i> | <i>d</i> vs <i>a</i> | <i>e</i> vs <i>a</i> | <i>f</i> vs <i>a</i> | <i>g</i> vs <i>a</i> | <i>h</i> vs <i>a</i> | <i>c</i> vs <i>b</i> | <i>d</i> vs <i>b</i> | <i>e</i> vs <i>b</i> | <i>f</i> vs <i>b</i> | <i>g</i> vs <i>b</i> | <i>h</i> vs <i>b</i> | <i>d</i> vs <i>c</i> | <i>e</i> vs <i>c</i> | <i>f</i> vs <i>c</i> | <i>g</i> vs <i>c</i> | <i>h</i> vs <i>c</i> | <i>e</i> vs <i>d</i> | <i>f</i> vs <i>d</i> | <i>g</i> vs <i>d</i> | <i>h</i> vs <i>d</i> | <i>f</i> vs <i>e</i> | <i>g</i> vs <i>e</i> | <i>h</i> vs <i>e</i> | <i>g</i> vs <i>f</i> | <i>h</i> vs <i>f</i> | <i>h</i> vs <i>g</i> |  |
|-------------|----------------------|----------------------|----------------------|----------------------|----------------------|----------------------|----------------------|----------------------|----------------------|----------------------|----------------------|----------------------|----------------------|----------------------|----------------------|----------------------|----------------------|----------------------|----------------------|----------------------|----------------------|----------------------|----------------------|----------------------|----------------------|----------------------|----------------------|----------------------|--|
| E Suc       |                      |                      |                      |                      |                      |                      |                      |                      |                      |                      |                      |                      |                      |                      |                      |                      |                      |                      |                      |                      |                      |                      |                      |                      |                      |                      |                      |                      |  |
| 1 h         |                      |                      |                      |                      |                      |                      |                      |                      |                      |                      |                      |                      |                      |                      |                      |                      |                      |                      |                      |                      |                      |                      |                      |                      |                      |                      |                      |                      |  |
| 4 h         |                      |                      |                      |                      |                      |                      |                      |                      |                      |                      |                      |                      |                      |                      |                      |                      |                      |                      |                      |                      |                      |                      |                      |                      |                      |                      |                      |                      |  |
| 8 h         |                      |                      |                      |                      |                      |                      |                      |                      |                      |                      |                      |                      |                      |                      |                      |                      |                      |                      |                      |                      |                      |                      |                      |                      |                      |                      |                      |                      |  |
| 12 h        |                      |                      |                      |                      |                      |                      |                      |                      |                      |                      |                      |                      |                      |                      |                      |                      |                      |                      |                      |                      |                      |                      |                      |                      |                      |                      |                      |                      |  |
| 15 h        |                      |                      |                      |                      |                      |                      |                      |                      |                      |                      |                      |                      |                      |                      |                      |                      |                      |                      |                      |                      |                      |                      |                      |                      |                      |                      |                      |                      |  |
| 17 h        |                      |                      |                      |                      |                      |                      |                      |                      |                      |                      |                      |                      |                      |                      |                      |                      |                      |                      |                      |                      |                      |                      |                      |                      |                      |                      |                      |                      |  |
| 20 h        |                      |                      |                      |                      |                      |                      |                      |                      |                      |                      |                      |                      |                      |                      |                      |                      |                      |                      |                      |                      |                      |                      |                      |                      |                      |                      |                      |                      |  |
| 23 h        |                      |                      |                      |                      |                      |                      |                      |                      |                      |                      |                      |                      |                      |                      |                      |                      |                      |                      |                      |                      |                      |                      |                      |                      |                      |                      |                      |                      |  |

*a* = *Ws*-2, *b* = *xpt*-1, *c* = *tpt*-1, *d* = *tpt*-1/*xpt*-1, *e* = *Col*-0, *f* = *tpt*-2, *g* = *tpt*-2/*xpt*-1, and *h* = *adg*1-1/*tpt*-2

**Doc S2 Table 5. Statistical analysis (ANOVA/Tukey-Kramer) of metabolite contents in leaves of wild-type and mutant plants.** The plants were grown in soil under HL-conditions (PFD = 300  $\mu\text{mol}\cdot\text{m}^{-2}\cdot\text{s}^{-1}$ ) in the long-day (see Figure 5, and Supplementary Table 5). Samples were taken at the middle of the dark period (**A**), or the beginning (B), and middle of the light period (C). The biotypes are denoted, **a** = Ws-2, **b** = *xpt-1*, **c** = *tpt-1/xpt-1*, **d** = Col-0, **e** = *tpt-2*, and **f** = *tpt-2/xpt-1*. The significance levels of  $P < 0.05$  or  $P < 0.01$  are indicated by light or dark blue colors.

## 6 Comparisons

### A Middle of the dark period (5 h in the dark)

| Metabolites  | b vs a | c vs a | d vs a | e vs a | f vs a | c vs b | d vs b | e vs b | f vs b | d vs c | e vs c | f vs c | e vs d | f vs d | e vs f |
|--------------|--------|--------|--------|--------|--------|--------|--------|--------|--------|--------|--------|--------|--------|--------|--------|
| 3-PGA        |        |        |        |        |        |        |        |        |        |        |        |        |        |        |        |
| DHAP         |        |        |        |        |        |        |        |        |        |        |        |        |        |        |        |
| S-7-P        |        |        |        |        |        |        |        |        |        |        |        |        |        |        |        |
| Ri5P         |        |        |        |        |        |        |        |        |        |        |        |        |        |        |        |
| Xu5P+Ru5P    |        |        |        |        |        |        |        |        |        |        |        |        |        |        |        |
| Fru6P        |        |        |        |        |        |        |        |        |        |        |        |        |        |        |        |
| Glc6P        |        |        |        |        |        |        |        |        |        |        |        |        |        |        |        |
| Glc1P        |        |        |        |        |        |        |        |        |        |        |        |        |        |        |        |
| UDPG         |        |        |        |        |        |        |        |        |        |        |        |        |        |        |        |
| Glycerol-3-P |        |        |        |        |        |        |        |        |        |        |        |        |        |        |        |
| ATP          |        |        |        |        |        |        |        |        |        |        |        |        |        |        |        |
| AMP          |        |        |        |        |        |        |        |        |        |        |        |        |        |        |        |
| Asn          |        |        |        |        |        |        |        |        |        |        |        |        |        |        |        |
| Phe          |        |        |        |        |        |        |        |        |        |        |        |        |        |        |        |
| Tyr          |        |        |        |        |        |        |        |        |        |        |        |        |        |        |        |
| Trp          |        |        |        |        |        |        |        |        |        |        |        |        |        |        |        |

### B Beginning of the light period (1 h in the light)

|              | b vs a | c vs a | d vs a | e vs a | f vs a | c vs b | d vs b | e vs b | f vs b | d vs c | e vs c | f vs c | e vs d | f vs d | e vs f |
|--------------|--------|--------|--------|--------|--------|--------|--------|--------|--------|--------|--------|--------|--------|--------|--------|
| 3-PGA        |        |        |        |        |        |        |        |        |        |        |        |        |        |        |        |
| DHAP         |        |        |        |        |        |        |        |        |        |        |        |        |        |        |        |
| S-7-P        |        |        |        |        |        |        |        |        |        |        |        |        |        |        |        |
| Ri5P         |        |        |        |        |        |        |        |        |        |        |        |        |        |        |        |
| Xu5P+Ru5P    |        |        |        |        |        |        |        |        |        |        |        |        |        |        |        |
| Fru6P        |        |        |        |        |        |        |        |        |        |        |        |        |        |        |        |
| Glc6P        |        |        |        |        |        |        |        |        |        |        |        |        |        |        |        |
| Glc1P        |        |        |        |        |        |        |        |        |        |        |        |        |        |        |        |
| UDPG         |        |        |        |        |        |        |        |        |        |        |        |        |        |        |        |
| Glycerol-3-P |        |        |        |        |        |        |        |        |        |        |        |        |        |        |        |
| ATP          |        |        |        |        |        |        |        |        |        |        |        |        |        |        |        |
| AMP          |        |        |        |        |        |        |        |        |        |        |        |        |        |        |        |
| Asn          |        |        |        |        |        |        |        |        |        |        |        |        |        |        |        |
| Phe          |        |        |        |        |        |        |        |        |        |        |        |        |        |        |        |
| Tyr          |        |        |        |        |        |        |        |        |        |        |        |        |        |        |        |
| Trp          |        |        |        |        |        |        |        |        |        |        |        |        |        |        |        |



**Doc S2 Table 5 (continued)**

**C Middle of the light period (8 h in the light)**

|              | <i>b</i> vs <i>a</i> | <i>c</i> vs <i>a</i> | <i>d</i> vs <i>a</i> | <i>e</i> vs <i>a</i> | <i>f</i> vs <i>a</i> | <i>c</i> vs <i>b</i> | <i>d</i> vs <i>b</i> | <i>e</i> vs <i>b</i> | <i>f</i> vs <i>b</i> | <i>d</i> vs <i>c</i> | <i>e</i> vs <i>c</i> | <i>f</i> vs <i>c</i> | <i>e</i> vs <i>d</i> | <i>f</i> vs <i>d</i> | <i>e</i> vs <i>f</i> |
|--------------|----------------------|----------------------|----------------------|----------------------|----------------------|----------------------|----------------------|----------------------|----------------------|----------------------|----------------------|----------------------|----------------------|----------------------|----------------------|
| 3-PGA        |                      |                      |                      |                      |                      |                      |                      |                      |                      |                      |                      |                      |                      |                      |                      |
| DHAP         |                      |                      |                      |                      |                      |                      |                      |                      |                      |                      |                      |                      |                      |                      |                      |
| S-7-P        |                      |                      |                      |                      |                      |                      |                      |                      |                      |                      |                      |                      |                      |                      |                      |
| Ri5P         |                      |                      |                      |                      |                      |                      |                      |                      |                      |                      |                      |                      |                      |                      |                      |
| Xu5P+Ru5P    |                      |                      |                      |                      |                      |                      |                      |                      |                      |                      |                      |                      |                      |                      |                      |
| Fru6P        |                      |                      |                      |                      |                      |                      |                      |                      |                      |                      |                      |                      |                      |                      |                      |
| Glc6P        |                      |                      |                      |                      |                      |                      |                      |                      |                      |                      |                      |                      |                      |                      |                      |
| Glc1P        |                      |                      |                      |                      |                      |                      |                      |                      |                      |                      |                      |                      |                      |                      |                      |
| UDPG         |                      |                      |                      |                      |                      |                      |                      |                      |                      |                      |                      |                      |                      |                      |                      |
| Glycerol-3-P |                      |                      |                      |                      |                      |                      |                      |                      |                      |                      |                      |                      |                      |                      |                      |
| ATP          |                      |                      |                      |                      |                      |                      |                      |                      |                      |                      |                      |                      |                      |                      |                      |
| AMP          |                      |                      |                      |                      |                      |                      |                      |                      |                      |                      |                      |                      |                      |                      |                      |
| Asn          |                      |                      |                      |                      |                      |                      |                      |                      |                      |                      |                      |                      |                      |                      |                      |
| Phe          |                      |                      |                      |                      |                      |                      |                      |                      |                      |                      |                      |                      |                      |                      |                      |
| Tyr          |                      |                      |                      |                      |                      |                      |                      |                      |                      |                      |                      |                      |                      |                      |                      |
| Trp          |                      |                      |                      |                      |                      |                      |                      |                      |                      |                      |                      |                      |                      |                      |                      |

*a* = *Ws-2*, *b* = *xpt-1*, *c* = *tpt-1/xpt-1*, *d* = *Col-0*, *e* = *tpt-2*, and *f* = *tpt-2/xpt-1*.



**Doc S2 Table 6 (continued)**

**B Beginning of the light period (1 h in the light)**

| Metabolite     | <i>b vs a</i> | <i>c vs a</i> | <i>d vs a</i> | <i>e vs a</i> | <i>f vs a</i> | <i>c vs b</i> | <i>d vs b</i> | <i>e vs b</i> | <i>f vs b</i> | <i>d vs c</i> | <i>e vs c</i> | <i>f vs c</i> | <i>e vs d</i> | <i>f vs d</i> | <i>e vs f</i> |
|----------------|---------------|---------------|---------------|---------------|---------------|---------------|---------------|---------------|---------------|---------------|---------------|---------------|---------------|---------------|---------------|
| Glu            |               | ■             |               |               |               |               |               |               |               |               |               |               |               |               |               |
| Asp            |               |               |               |               |               |               |               |               |               |               |               |               |               |               |               |
| Ser            |               |               |               |               |               |               |               |               |               |               |               |               |               |               |               |
| Gly            |               | ■             | ■             |               | ■             | ■             | ■             |               | ■             |               |               |               |               |               |               |
| Thr            |               |               |               |               |               |               |               |               |               |               |               |               |               |               |               |
| Pro            |               |               |               |               |               |               |               |               |               |               |               |               |               |               |               |
| Phe            |               | ■             |               |               | ■             | ■             |               |               |               | ■             |               |               |               |               |               |
| Tyr            |               |               |               |               |               |               |               |               |               |               |               |               |               | ■             |               |
| Val            |               |               |               |               | ■             |               |               |               | ■             |               |               | ■             |               | ■             |               |
| Leu            |               |               |               |               | ■             |               |               |               | ■             |               |               |               |               | ■             |               |
| Ile            |               |               |               |               | ■             |               |               |               | ■             |               |               |               |               | ■             |               |
| Lys            |               |               |               |               |               |               |               |               |               |               |               |               |               |               |               |
| Met            |               |               |               |               |               |               |               |               |               |               |               |               |               |               |               |
| β-Ala          |               |               |               |               | ■             |               |               |               | ■             |               |               | ■             |               | ■             | ■             |
| Glycerol       |               |               |               |               |               |               |               |               |               |               |               |               |               |               |               |
| Mannitol       |               |               |               |               |               |               |               |               |               |               |               |               |               |               |               |
| Myoinositol    |               |               | ■             | ■             |               |               | ■             |               |               |               |               |               |               |               |               |
| Sorbitol       |               |               |               |               |               |               |               |               |               |               |               |               |               |               |               |
| Putrescine     |               |               |               |               |               |               |               |               |               |               |               |               |               |               |               |
| (Iso) Citrate  |               |               |               |               |               |               |               |               |               |               |               |               |               |               |               |
| 2-Oxoglutarate |               |               |               |               |               |               |               |               |               |               |               |               |               | ■             |               |
| Succinate      |               |               |               |               | ■             |               |               |               | ■             |               |               | ■             |               | ■             | ■             |
| Fumarate       |               |               |               |               | ■             | ■             |               | ■             | ■             |               |               |               |               |               |               |
| Malate         |               |               |               |               |               |               |               |               |               |               |               |               |               |               |               |
| Glycolate      |               |               |               |               |               |               |               |               |               |               |               |               |               |               |               |
| Lactate        |               |               |               |               |               |               |               |               |               |               |               |               |               |               |               |
| Glycerate      |               |               |               |               |               |               |               |               |               |               |               |               |               |               |               |
| Gluconate      |               |               |               |               | ■             |               |               |               | ■             |               |               | ■             |               | ■             | ■             |
| Maleate        |               |               |               |               |               |               |               |               |               |               |               |               |               |               |               |
| Malonate       |               |               |               | ■             |               |               |               |               |               |               |               |               | ■             |               |               |
| Shikimate      |               |               |               | ■             | ■             |               |               |               | ■             |               |               |               |               |               |               |
| Quinate        |               |               |               |               |               |               |               |               |               |               |               |               |               |               |               |
| Glc            |               |               |               |               |               |               |               |               |               |               |               |               |               |               |               |
| Fru            |               |               |               | ■             |               |               |               | ■             |               |               |               |               |               |               | ■             |
| Suc            |               |               |               |               |               |               |               |               |               |               |               | ■             |               |               |               |
| Maltose        |               |               |               |               | ■             |               |               |               | ■             |               |               | ■             |               | ■             | ■             |
| Mannose        |               |               |               |               |               |               |               |               |               |               |               |               |               |               |               |
| Xylose         |               |               |               |               |               |               |               |               |               |               |               |               |               |               |               |

**a** = Ws-2, **b** = *xpt-1*, **c** = *tpt-1/xpt-1*, **d** = Col-0, **e** = *tpt-2*, and **f** = *tpt-2/xpt-1*.

**Doc S2 Table 6 (continued)**

**C Middle of the light period (8 h in the light)**

| Metabolites    | <i>b</i> vs <i>a</i> | <i>c</i> vs <i>a</i> | <i>d</i> vs <i>a</i> | <i>e</i> vs <i>a</i> | <i>f</i> vs <i>a</i> | <i>c</i> vs <i>b</i> | <i>d</i> vs <i>b</i> | <i>e</i> vs <i>b</i> | <i>f</i> vs <i>b</i> | <i>d</i> vs <i>c</i> | <i>e</i> vs <i>c</i> | <i>f</i> vs <i>c</i> | <i>e</i> vs <i>d</i> | <i>f</i> vs <i>d</i> | <i>e</i> vs <i>f</i> |
|----------------|----------------------|----------------------|----------------------|----------------------|----------------------|----------------------|----------------------|----------------------|----------------------|----------------------|----------------------|----------------------|----------------------|----------------------|----------------------|
| Glu            |                      | ■                    |                      |                      |                      |                      |                      |                      |                      |                      |                      |                      |                      |                      |                      |
| Asp            |                      |                      |                      |                      |                      |                      |                      |                      |                      |                      |                      |                      |                      |                      |                      |
| Ser            |                      |                      |                      |                      |                      |                      |                      |                      |                      |                      |                      |                      |                      |                      |                      |
| Gly            |                      | ■                    | ■                    | ■                    | ■                    | ■                    |                      |                      | ■                    |                      |                      |                      |                      |                      |                      |
| Thr            |                      |                      |                      |                      |                      |                      |                      |                      |                      |                      |                      |                      |                      |                      |                      |
| Pro            | ■                    | ■                    | ■                    | ■                    | ■                    |                      |                      |                      |                      |                      |                      |                      |                      |                      |                      |
| Phe            |                      | ■                    |                      |                      | ■                    |                      |                      |                      |                      |                      |                      |                      |                      |                      |                      |
| Tyr            |                      |                      |                      |                      |                      |                      |                      |                      |                      |                      |                      |                      |                      |                      |                      |
| Val            |                      |                      |                      |                      |                      |                      |                      |                      | ■                    |                      |                      |                      |                      | ■                    |                      |
| Leu            |                      |                      |                      |                      |                      |                      |                      |                      | ■                    |                      |                      |                      |                      | ■                    |                      |
| Ile            |                      |                      |                      |                      |                      |                      |                      |                      | ■                    |                      |                      |                      |                      | ■                    |                      |
| Lys            |                      |                      |                      |                      |                      |                      |                      |                      |                      |                      |                      |                      |                      |                      |                      |
| Met            |                      | ■                    |                      |                      | ■                    |                      |                      |                      |                      |                      |                      |                      |                      |                      |                      |
| β-Ala          |                      |                      |                      | ■                    | ■                    |                      |                      | ■                    | ■                    |                      | ■                    | ■                    |                      | ■                    | ■                    |
| Glycerol       |                      |                      |                      |                      |                      |                      |                      |                      |                      |                      |                      |                      |                      |                      |                      |
| Mannitol       |                      |                      |                      |                      |                      |                      |                      |                      | ■                    |                      |                      |                      |                      |                      |                      |
| Myoinositol    |                      |                      | ■                    | ■                    |                      |                      |                      |                      |                      | ■                    | ■                    |                      |                      |                      |                      |
| Sorbitol       |                      |                      |                      |                      |                      |                      |                      |                      |                      |                      |                      |                      |                      |                      |                      |
| Putrescine     |                      |                      |                      |                      |                      |                      |                      |                      |                      |                      |                      |                      |                      |                      |                      |
| (Iso) Citrate  |                      |                      |                      |                      |                      |                      |                      |                      |                      |                      |                      |                      |                      |                      |                      |
| 2-Oxoglutarate |                      |                      |                      |                      |                      |                      |                      |                      |                      |                      |                      |                      |                      |                      |                      |
| Succinate      |                      |                      |                      |                      | ■                    |                      |                      |                      | ■                    |                      |                      | ■                    |                      | ■                    | ■                    |
| Fumarate       |                      |                      |                      | ■                    | ■                    |                      |                      | ■                    | ■                    |                      |                      |                      |                      | ■                    |                      |
| Malate         |                      |                      |                      |                      |                      |                      |                      |                      |                      |                      |                      |                      |                      |                      |                      |
| Glycolate      |                      |                      |                      |                      |                      |                      |                      |                      |                      |                      |                      |                      |                      |                      |                      |
| Lactate        |                      |                      |                      |                      |                      |                      |                      |                      | ■                    |                      |                      |                      |                      |                      |                      |
| Glycerate      |                      |                      |                      |                      |                      |                      |                      |                      |                      |                      |                      |                      |                      |                      |                      |
| Gluconate      |                      |                      |                      |                      | ■                    |                      |                      |                      | ■                    |                      |                      | ■                    |                      | ■                    | ■                    |
| Maleate        |                      |                      |                      |                      |                      |                      |                      |                      |                      |                      |                      |                      |                      |                      |                      |
| Malonate       |                      |                      |                      |                      | ■                    |                      |                      |                      | ■                    |                      |                      | ■                    |                      | ■                    | ■                    |
| Shikimate      |                      |                      |                      |                      |                      |                      |                      |                      |                      |                      |                      |                      |                      |                      |                      |
| Quinate        | ■                    |                      |                      |                      |                      | ■                    | ■                    | ■                    |                      |                      |                      |                      |                      |                      |                      |
| Glc            |                      |                      |                      |                      |                      |                      |                      |                      |                      |                      |                      |                      |                      |                      |                      |
| Fru            |                      |                      |                      | ■                    |                      |                      | ■                    | ■                    |                      |                      |                      |                      |                      | ■                    | ■                    |
| Suc            |                      | ■                    |                      | ■                    |                      |                      |                      |                      |                      |                      |                      |                      |                      |                      |                      |
| Maltose        |                      | ■                    |                      |                      | ■                    | ■                    |                      |                      | ■                    | ■                    |                      | ■                    |                      | ■                    | ■                    |
| Mannose        |                      |                      |                      |                      |                      |                      |                      |                      |                      |                      |                      |                      |                      |                      |                      |
| Xylose         |                      |                      |                      |                      |                      |                      |                      |                      |                      |                      |                      |                      |                      |                      |                      |

**a** = Ws-2, **b** = *xpt-1*, **c** = *tpt-1/xpt-1*, **d** = Col-0, **e** = *tpt-2*, and **f** = *tpt-2/xpt-1*.

**Doc S2 Table 7. Statistical analysis (ANOVA/Tukey-Kramer) of soluble amino acid contents in leaves of wild-type and mutant plants.**

The plants were grown in soil under HL-conditions (PFD = 300  $\mu\text{mol}\cdot\text{m}^{-2}\cdot\text{s}^{-1}$ ) in the long-day (Figure 6C, main article). Samples were taken either 4 h in the dark (**A, C**) or 8 h in the light (**B, D**). The data represents the mean  $\pm$  SE of n = 4 to 5 independent replicates. The biotypes are denoted, **a** = *Ws-2*, **b** = *Col-0*, **c** = *tpt-2*, **d** = *tpt-2/xpt-1*, **e** = *amiRNA:XPT tpt-2 #3*, **f** = *amiRNA:XPT tpt-2 #4*, **g** = *adg1-1/tpt-2*, **h** = *xpt-1*, **i** = *tpt-1*, and **j** = *tpt-1/xpt-1*. The significance levels of P < 0.05 or P < 0.01 are indicated by light or dark blue colors.

**A** 4 h dark (absolute)

**7 Comparisons**

|                    | <i>b vs a</i> | <i>c vs a</i> | <i>d vs a</i> | <i>e vs a</i> | <i>f vs a</i> | <i>g vs a</i> | <i>c vs b</i> | <i>d vs b</i> | <i>e vs b</i> | <i>f vs b</i> | <i>g vs b</i> | <i>d vs c</i> | <i>e vs c</i> | <i>f vs c</i> | <i>g vs c</i> | <i>e vs d</i> | <i>f vs d</i> | <i>g vs d</i> | <i>f vs e</i> | <i>g vs e</i> | <i>f vs g</i> |
|--------------------|---------------|---------------|---------------|---------------|---------------|---------------|---------------|---------------|---------------|---------------|---------------|---------------|---------------|---------------|---------------|---------------|---------------|---------------|---------------|---------------|---------------|
| <b>Amino acids</b> |               |               |               |               |               |               |               |               |               |               |               |               |               |               |               |               |               |               |               |               |               |
| Glu                |               |               |               |               |               |               |               |               |               |               |               |               |               |               |               |               |               |               |               |               |               |
| Gln                |               |               |               |               |               |               |               |               |               |               |               |               |               |               |               |               |               |               |               |               |               |
| Asp                |               |               |               |               |               |               |               |               |               |               |               |               |               |               |               |               |               |               |               |               |               |
| Asn                |               |               |               |               |               |               |               |               |               |               |               |               |               |               |               |               |               |               |               |               |               |
| Ala                |               |               |               |               |               |               |               |               |               |               |               |               |               |               |               |               |               |               |               |               |               |
| Ser                |               |               |               |               |               |               |               |               |               |               |               |               |               |               |               |               |               |               |               |               |               |
| Gly                |               |               |               |               |               |               |               |               |               |               |               |               |               |               |               |               |               |               |               |               |               |
| Thr                |               |               |               |               |               |               |               |               |               |               |               |               |               |               |               |               |               |               |               |               |               |
| His                |               |               |               |               |               |               |               |               |               |               |               |               |               |               |               |               |               |               |               |               |               |
| Arg                |               |               |               |               |               |               |               |               |               |               |               |               |               |               |               |               |               |               |               |               |               |
| Phe                |               |               |               |               |               |               |               |               |               |               |               |               |               |               |               |               |               |               |               |               |               |
| Tyr                |               |               |               |               |               |               |               |               |               |               |               |               |               |               |               |               |               |               |               |               |               |
| Trp                |               |               |               |               |               |               |               |               |               |               |               |               |               |               |               |               |               |               |               |               |               |
| Val                |               |               |               |               |               |               |               |               |               |               |               |               |               |               |               |               |               |               |               |               |               |
| Leu                |               |               |               |               |               |               |               |               |               |               |               |               |               |               |               |               |               |               |               |               |               |
| Ile                |               |               |               |               |               |               |               |               |               |               |               |               |               |               |               |               |               |               |               |               |               |
| Lys                |               |               |               |               |               |               |               |               |               |               |               |               |               |               |               |               |               |               |               |               |               |
| $\Sigma$           |               |               |               |               |               |               |               |               |               |               |               |               |               |               |               |               |               |               |               |               |               |

**4 comparisons**

|                    | <i>h vs a</i> | <i>i vs a</i> | <i>j vs a</i> | <i>i vs h</i> | <i>j vs h</i> | <i>i vs j</i> |
|--------------------|---------------|---------------|---------------|---------------|---------------|---------------|
| <b>Amino acids</b> |               |               |               |               |               |               |
| Glu                |               |               |               |               |               |               |
| Gln                |               |               |               |               |               |               |
| Asp                |               |               |               |               |               |               |
| Asn                |               |               |               |               |               |               |
| Ala                |               |               |               |               |               |               |
| Ser                |               |               |               |               |               |               |
| Gly                |               |               |               |               |               |               |
| Thr                |               |               |               |               |               |               |
| His                |               |               |               |               |               |               |
| Arg                |               |               |               |               |               |               |
| Phe                |               |               |               |               |               |               |
| Tyr                |               |               |               |               |               |               |
| Trp                |               |               |               |               |               |               |
| Val                |               |               |               |               |               |               |
| Leu                |               |               |               |               |               |               |
| Ile                |               |               |               |               |               |               |
| Lys                |               |               |               |               |               |               |
| $\Sigma$           |               |               |               |               |               |               |



Doc S2 Table 7. (continued)

C 4 h dark (relative)

|                    | <i>b vs a</i> | <i>c vs a</i> | <i>d vs a</i> | <i>e vs a</i> | <i>f vs a</i> | <i>g vs a</i> | <i>c vs b</i> | <i>d vs b</i> | <i>e vs b</i> | <i>f vs b</i> | <i>g vs b</i> | <i>d vs c</i> | <i>e vs c</i> | <i>f vs c</i> | <i>g vs c</i> | <i>e vs d</i> | <i>f vs d</i> | <i>g vs d</i> | <i>f vs e</i> | <i>g vs e</i> | <i>f vs g</i> | <i>h vs a</i> | <i>i vs a</i> | <i>j vs a</i> | <i>i vs h</i> | <i>j vs h</i> | <i>i vs j</i> |  |  |
|--------------------|---------------|---------------|---------------|---------------|---------------|---------------|---------------|---------------|---------------|---------------|---------------|---------------|---------------|---------------|---------------|---------------|---------------|---------------|---------------|---------------|---------------|---------------|---------------|---------------|---------------|---------------|---------------|--|--|
| <b>Amino acids</b> |               |               |               |               |               |               |               |               |               |               |               |               |               |               |               |               |               |               |               |               |               |               |               |               |               |               |               |  |  |
| Glu                |               |               |               |               |               |               |               |               |               |               |               |               |               |               |               |               |               |               |               |               |               |               |               |               |               |               |               |  |  |
| Gln                |               |               |               |               |               |               |               |               |               |               |               |               |               |               |               |               |               |               |               |               |               |               |               |               |               |               |               |  |  |
| Asp                |               |               |               |               |               |               |               |               |               |               |               |               |               |               |               |               |               |               |               |               |               |               |               |               |               |               |               |  |  |
| Asn                |               |               |               |               |               |               |               |               |               |               |               |               |               |               |               |               |               |               |               |               |               |               |               |               |               |               |               |  |  |
| Ala                |               |               |               |               |               |               |               |               |               |               |               |               |               |               |               |               |               |               |               |               |               |               |               |               |               |               |               |  |  |
| Ser                |               |               |               |               |               |               |               |               |               |               |               |               |               |               |               |               |               |               |               |               |               |               |               |               |               |               |               |  |  |
| Gly                |               |               |               |               |               |               |               |               |               |               |               |               |               |               |               |               |               |               |               |               |               |               |               |               |               |               |               |  |  |
| Thr                |               |               |               |               |               |               |               |               |               |               |               |               |               |               |               |               |               |               |               |               |               |               |               |               |               |               |               |  |  |
| His                |               |               |               |               |               |               |               |               |               |               |               |               |               |               |               |               |               |               |               |               |               |               |               |               |               |               |               |  |  |
| Arg                |               |               |               |               |               |               |               |               |               |               |               |               |               |               |               |               |               |               |               |               |               |               |               |               |               |               |               |  |  |
| Phe                |               |               |               |               |               |               |               |               |               |               |               |               |               |               |               |               |               |               |               |               |               |               |               |               |               |               |               |  |  |
| Tyr                |               |               |               |               |               |               |               |               |               |               |               |               |               |               |               |               |               |               |               |               |               |               |               |               |               |               |               |  |  |
| Trp                |               |               |               |               |               |               |               |               |               |               |               |               |               |               |               |               |               |               |               |               |               |               |               |               |               |               |               |  |  |
| Val                |               |               |               |               |               |               |               |               |               |               |               |               |               |               |               |               |               |               |               |               |               |               |               |               |               |               |               |  |  |
| Leu                |               |               |               |               |               |               |               |               |               |               |               |               |               |               |               |               |               |               |               |               |               |               |               |               |               |               |               |  |  |
| Ile                |               |               |               |               |               |               |               |               |               |               |               |               |               |               |               |               |               |               |               |               |               |               |               |               |               |               |               |  |  |
| Lys                |               |               |               |               |               |               |               |               |               |               |               |               |               |               |               |               |               |               |               |               |               |               |               |               |               |               |               |  |  |

*a* = Ws-2, *b* = Col-0, *c* = *tpt-2*, *d* = *tpt-2/xpt-1*, *e* = amiRNA:*XPT tpt-2* #3, *f* = amiRNA:*XPT tpt-2* #4, *g* = *adg1-1/tpt-2*, *h* = *xpt-1*, *i* = *tpt-1*, and *j* = *tpt-1/xpt-1*.









**Doc S2 Table 10. Statistical analysis (ANOVA/Tukey-Kramer) of feeding Suc, Gln or both on rosette growth of wild-type and mutant plants.** Plants were grown under HL-conditions (i.e. a PFD of  $300 \mu\text{mol}\cdot\text{m}^{-2}\cdot\text{s}^{-1}$ ) in the long-day on 1/2 Ms agar plates in the absence or presence of 50 mM Suc, 2 mM Gln, or both. under HL. (Figure 7, main article; Supplementary Figures 2 and 3). The conditions are denoted, **a** = 1/2 MS, **b** = 50 mM Suc, **c** = 2 mM Gln, and **d** = 50 mM Suc and 2 mM Gln. DAS = days after sowing. The significance levels of  $P < 0.05$  or  $P < 0.01$  are indicated by light or dark blue colors.

| 4 Comparisons      |        |        |        |        |        | 4 Comparisons             |                |        |        |        |        | 4 Comparisons       |        |                |        |        |        |        |        |        |
|--------------------|--------|--------|--------|--------|--------|---------------------------|----------------|--------|--------|--------|--------|---------------------|--------|----------------|--------|--------|--------|--------|--------|--------|
| Time of growth     | b vs a | c vs a | d vs a | c vs b | d vs b | d vs c                    | Time of growth | b vs a | c vs a | d vs a | c vs b | d vs b              | d vs c | Time of growth | b vs a | c vs a | d vs a | c vs b | d vs b | d vs c |
| <b>Ws-2</b>        |        |        |        |        |        | <b>tpt-1/xpt-1</b>        |                |        |        |        |        | <b>Col-0</b>        |        |                |        |        |        |        |        |        |
| 11 DAS             |        |        | ■      |        |        |                           | 11 DAS         | ■      |        | ■      |        |                     | ■      | 11 DAS         |        |        |        |        |        |        |
| 15 DAS             |        |        | ■      |        |        | ■                         | 15 DAS         | ■      |        | ■      |        | ■                   | ■      | 15 DAS         |        |        | ■      |        |        | ■      |
| 19 DAS             |        |        |        |        |        |                           | 19 DAS         |        |        | ■      |        |                     | ■      | 19 DAS         |        |        |        |        |        |        |
| 22 DAS             |        |        |        |        |        |                           | 22 DAS         |        |        | ■      |        |                     | ■      | 22 DAS         |        |        |        |        |        |        |
| <b>tpt-2/xpt-1</b> |        |        |        |        |        | <b>gpt2-1/tpt-2/xpt-1</b> |                |        |        |        |        | <b>adg1-1/tpt-2</b> |        |                |        |        |        |        |        |        |
| 11 DAS             | ■      |        | ■      | ■      |        | ■                         | 11 DAS         | ■      |        | ■      | ■      |                     | ■      | 11 DAS         | ■      |        | ■      | ■      |        | ■      |
| 15 DAS             | ■      |        | ■      | ■      |        | ■                         | 15 DAS         | ■      |        | ■      | ■      |                     | ■      | 15 DAS         | ■      |        | ■      | ■      |        | ■      |
| 19 DAS             | ■      |        | ■      | ■      |        | ■                         | 19 DAS         | ■      |        | ■      | ■      |                     | ■      | 19 DAS         | ■      |        | ■      | ■      |        | ■      |
| 22 DAS             | ■      |        | ■      | ■      |        | ■                         | 22 DAS         | ■      |        | ■      | ■      |                     | ■      | 22 DAS         | ■      |        | ■      | ■      | ■      | ■      |

**Doc S2 Table 11. Statistical analysis (ANOVA/Tukey-Kramer) of feeding Suc, Gln or both on modulated Chl a fluorescence parameters in wild-type and mutant plants.** Plants were grown under HL-conditions (i.e. a PFD of  $300 \mu\text{mol}\cdot\text{m}^{-2}\cdot\text{s}^{-1}$ ) in the long-day on 1/2 Ms agar plates in the absence or presence of 50 mM Suc, 2 mM Gln, or both. (Figure 7, main article; Supplementary Figure 4). The biotypes are denoted, **a** = Ws-2, **b** = *tpt-1/xpt-1*, **c** = Col-0, **d** = *tpt-2/xpt-1*, **e** = *gpt2-1/tpt-2/xpt-1*, and **f** = *adg1-1/tpt-2*. The significance levels of  $P < 0.05$  or  $P < 0.01$  are indicated by light or dark blue colors.

**6 Comparisons**

**6 Comparisons**

| PS-parameters                  | b vs a      | c vs a | d vs a     | e vs a     | f vs a     | c vs b     | d vs b     | e vs b | f vs b     | d vs c     | e vs c     | f vs c     | e vs d     | f vs d     | f vs e     | PS-parameters                  | b vs a      | c vs a | d vs a     | e vs a     | f vs a     | c vs b     | d vs b | e vs b     | f vs b     | d vs c     | e vs c     | f vs c     | e vs d     | f vs d     | f vs e     |
|--------------------------------|-------------|--------|------------|------------|------------|------------|------------|--------|------------|------------|------------|------------|------------|------------|------------|--------------------------------|-------------|--------|------------|------------|------------|------------|--------|------------|------------|------------|------------|------------|------------|------------|------------|
|                                | <b>½ MS</b> |        |            |            |            |            |            |        |            |            |            |            |            |            |            |                                | <b>+Suc</b> |        |            |            |            |            |        |            |            |            |            |            |            |            |            |
| F <sub>v</sub> /F <sub>m</sub> | Light Blue  |        | Light Blue | Light Blue | Light Blue | Light Blue | Light Blue |        | Light Blue | Light Blue | Light Blue | Light Blue | Light Blue | Light Blue | Light Blue | F <sub>v</sub> /F <sub>m</sub> | Light Blue  |        | Light Blue | Light Blue | Light Blue |            |        | Light Blue | Light Blue | Light Blue | Light Blue |            | Light Blue | Light Blue |            |
| ΦPSII                          | Dark Blue   |        | Light Blue |            | Light Blue | Light Blue |            |        | Light Blue | Light Blue | Light Blue | Light Blue | Dark Blue  | Light Blue | Light Blue | ΦPSII                          | Light Blue  |        | Light Blue |            | Light Blue | Light Blue |        |            | Light Blue | Light Blue | Light Blue | Light Blue | Light Blue | Light Blue | Light Blue |
| <b>+Gln</b>                    |             |        |            |            |            |            |            |        |            |            |            |            |            |            |            | <b>+Suc + Gln</b>              |             |        |            |            |            |            |        |            |            |            |            |            |            |            |            |
| F <sub>v</sub> /F <sub>m</sub> | Light Blue  |        | Light Blue | Light Blue | Light Blue | Light Blue |            |        | Light Blue | Light Blue | Light Blue | Light Blue |            | Light Blue | Light Blue | F <sub>v</sub> /F <sub>m</sub> |             |        |            | Light Blue | Light Blue |            |        | Light Blue | Light Blue |            | Light Blue | Light Blue | Light Blue | Light Blue |            |
| ΦPSII                          |             |        |            |            | Light Blue | Light Blue |            |        | Light Blue | Light Blue | Light Blue | Light Blue |            | Light Blue | Light Blue | ΦPSII                          |             |        |            |            | Light Blue | Light Blue |        |            | Dark Blue  | Light Blue | Light Blue | Light Blue | Light Blue | Light Blue |            |

**Doc S2 Table 12. Statistical analysis (ANOVA/Tukey-Kramer) of feeding Suc, Gln or both on modulated Chl a fluorescence parameters in wild-type and mutant plants.** Plants were grown under HL-conditions (i.e. a PFD of 300  $\mu\text{mol}\cdot\text{m}^{-2}\cdot\text{s}^{-1}$ ) in the long-day on 1/2 Ms agar plates in the absence or presence of 50 mM Suc, 2 mM Gln, or both. (Figure 7, main article; Supplementary Figure 4). The conditions are denoted, **a** = 1/2 MS, **b** = 50 mM Suc, **c** = 2 mM Gln, and **d** = 50 mM Suc and 2 mM Gln. The significance levels of  $P < 0.05$  or  $P < 0.01$  are indicated by light or dark blue colors.

| 4 Comparisons             |  |               |               |               |               |               | 4 Comparisons                    |                   |  |               |               |               |               | 4 Comparisons              |               |                   |  |               |               |               |               |               |               |
|---------------------------|--|---------------|---------------|---------------|---------------|---------------|----------------------------------|-------------------|--|---------------|---------------|---------------|---------------|----------------------------|---------------|-------------------|--|---------------|---------------|---------------|---------------|---------------|---------------|
| PS parameters             |  | <i>b vs a</i> | <i>c vs a</i> | <i>d vs a</i> | <i>c vs b</i> | <i>d vs b</i> | <i>d vs c</i>                    | PS parameters     |  | <i>b vs a</i> | <i>c vs a</i> | <i>d vs a</i> | <i>c vs b</i> | <i>d vs b</i>              | <i>d vs c</i> | PS parameters     |  | <i>b vs a</i> | <i>c vs a</i> | <i>d vs a</i> | <i>c vs b</i> | <i>d vs b</i> | <i>d vs c</i> |
| <b>Ws-2</b>               |  |               |               |               |               |               | <b><i>tpt-1/xpt-1</i></b>        |                   |  |               |               |               |               | <b>Col-0</b>               |               |                   |  |               |               |               |               |               |               |
| $F_v/F_m$                 |  | Dark Blue     | Dark Blue     | Dark Blue     | Dark Blue     | Light Blue    | Light Blue                       | $F_v/F_m$         |  | Dark Blue     | Light Blue    | Dark Blue     | Light Blue    | Light Blue                 | Light Blue    | $F_v/F_m$         |  | Light Blue    | Light Blue    | Dark Blue     | Light Blue    | Light Blue    | Dark Blue     |
| $\Phi\text{PSII}$         |  | Light Blue    | Dark Blue     | Dark Blue     | Dark Blue     | Dark Blue     | Light Blue                       | $\Phi\text{PSII}$ |  | Light Blue    | Light Blue    | Light Blue    | Light Blue    | Light Blue                 | Light Blue    | $\Phi\text{PSII}$ |  | Light Blue    | Dark Blue     | Dark Blue     | Dark Blue     | Dark Blue     | Light Blue    |
| <b><i>tpt-2/xpt-1</i></b> |  |               |               |               |               |               | <b><i>gpt2-1/tpt-2/xpt-1</i></b> |                   |  |               |               |               |               | <b><i>adg1-1/tpt-2</i></b> |               |                   |  |               |               |               |               |               |               |
| $F_v/F_m$                 |  | Dark Blue     | Dark Blue     | Dark Blue     | Dark Blue     | Light Blue    | Light Blue                       | $F_v/F_m$         |  | Dark Blue     | Light Blue    | Light Blue    | Light Blue    | Light Blue                 | Light Blue    | $F_v/F_m$         |  | Dark Blue     | Dark Blue     | Dark Blue     | Dark Blue     | Light Blue    | Dark Blue     |
| $\Phi\text{PSII}$         |  | Dark Blue     | Light Blue    | Dark Blue     | Dark Blue     | Light Blue    | Light Blue                       | $\Phi\text{PSII}$ |  | Light Blue    | Light Blue    | Light Blue    | Light Blue    | Light Blue                 | Light Blue    | $\Phi\text{PSII}$ |  | Dark Blue     | Light Blue    | Dark Blue     | Dark Blue     | Light Blue    | Dark Blue     |

**Doc S2 Table 13. Statistical analysis (ANOVA/Tukey-Kramer) of spectroscopic analysis of thylakoid membranes isolated from wild-type and mutants plants.** Plants were grown in soil under HL-conditions (PFD = 300  $\mu\text{mol}\cdot\text{m}^{-2}\cdot\text{s}^{-1}$ ) in the long-day. Functional components of PSII, PSI and the Cyt  $b_6/f$  complex were determined by spectroscopic methods using thylakoids isolated from the plants and were either referred to a leaf area- (Figure 8B, main article) or Chl basis (Supplementary Figure 5). The biotypes are denoted, **a** = Col-0, **b** = *tpt-2*, **c** = *tpt-2/xpt-1*, **d** = amiRNA:*XPT tpt-2* #4, **e** = *Ws-2*, **f** = *xpt-1*, **g** = *tpt-1*, and **h** = *tpt-1/xpt-1*. The significance levels of  $P < 0.05$  or  $P < 0.01$  are indicated by light or dark blue colors.

### 8 Comparisons

| PS complexes           | <i>b</i> vs <i>a</i> | <i>c</i> vs <i>a</i> | <i>d</i> vs <i>a</i> | <i>e</i> vs <i>a</i> | <i>f</i> vs <i>a</i> | <i>g</i> vs <i>a</i> | <i>h</i> vs <i>a</i> | <i>c</i> vs <i>b</i> | <i>d</i> vs <i>b</i> | <i>e</i> vs <i>b</i> | <i>f</i> vs <i>b</i> | <i>g</i> vs <i>b</i> | <i>h</i> vs <i>b</i> | <i>d</i> vs <i>c</i> | <i>e</i> vs <i>c</i> | <i>f</i> vs <i>c</i> | <i>g</i> vs <i>c</i> | <i>h</i> vs <i>c</i> | <i>e</i> vs <i>d</i> | <i>f</i> vs <i>d</i> | <i>g</i> vs <i>d</i> | <i>h</i> vs <i>d</i> | <i>f</i> vs <i>e</i> | <i>g</i> vs <i>e</i> | <i>h</i> vs <i>e</i> | <i>g</i> vs <i>f</i> | <i>h</i> vs <i>f</i> | <i>h</i> vs <i>g</i> |            |  |
|------------------------|----------------------|----------------------|----------------------|----------------------|----------------------|----------------------|----------------------|----------------------|----------------------|----------------------|----------------------|----------------------|----------------------|----------------------|----------------------|----------------------|----------------------|----------------------|----------------------|----------------------|----------------------|----------------------|----------------------|----------------------|----------------------|----------------------|----------------------|----------------------|------------|--|
| <b>Leaf area basis</b> |                      |                      |                      |                      |                      |                      |                      |                      |                      |                      |                      |                      |                      |                      |                      |                      |                      |                      |                      |                      |                      |                      |                      |                      |                      |                      |                      |                      |            |  |
| PSII                   |                      | Dark Blue            | Light Blue           |                      |                      |                      | Dark Blue            | Dark Blue            |                      |                      |                      |                      | Dark Blue            |                      | Dark Blue            | Dark Blue            | Light Blue           |                      |                      | Dark Blue            |                      | Light Blue           |                      |                      |                      | Dark Blue            |                      | Dark Blue            | Dark Blue  |  |
| Cyt $b_6/f$            |                      | Dark Blue            | Dark Blue            |                      |                      |                      | Dark Blue            | Dark Blue            |                      |                      | Dark Blue            |                      | Light Blue           | Dark Blue            | Dark Blue            | Dark Blue            | Dark Blue            |                      | Dark Blue            | Dark Blue            | Light Blue           |                      |                      |                      |                      | Dark Blue            |                      | Dark Blue            | Dark Blue  |  |
| PSI                    | Dark Blue            | Dark Blue            | Dark Blue            |                      | Dark Blue            | Dark Blue            | Dark Blue            | Dark Blue            | Dark Blue            | Dark Blue            | Dark Blue            |                      | Dark Blue            | Dark Blue            | Dark Blue            | Dark Blue            | Dark Blue            | Dark Blue            | Dark Blue            | Dark Blue            | Dark Blue            | Light Blue           | Dark Blue            | Dark Blue            | Dark Blue            | Dark Blue            | Dark Blue            | Dark Blue            | Dark Blue  |  |
| <b>Chl basis</b>       |                      |                      |                      |                      |                      |                      |                      |                      |                      |                      |                      |                      |                      |                      |                      |                      |                      |                      |                      |                      |                      |                      |                      |                      |                      |                      |                      |                      |            |  |
| Chl <i>a/b</i> -ratio  |                      | Dark Blue            |                      |                      |                      |                      |                      | Dark Blue            |                      |                      |                      |                      |                      | Dark Blue            | Dark Blue            | Dark Blue            | Dark Blue            |                      |                      |                      |                      | Light Blue           |                      |                      |                      |                      | Light Blue           |                      | Light Blue |  |
| PSII                   |                      |                      |                      |                      |                      |                      |                      |                      |                      |                      |                      |                      |                      |                      |                      |                      |                      | Dark Blue            |                      |                      |                      |                      |                      |                      |                      |                      |                      |                      |            |  |
| Cyt $b_6/f$            |                      |                      |                      |                      |                      |                      | Light Blue           |                      |                      |                      |                      | Light Blue           |                      |                      |                      |                      |                      |                      |                      |                      |                      |                      |                      |                      |                      |                      |                      |                      |            |  |
| PSI                    |                      | Dark Blue            |                      |                      | Light Blue           |                      |                      | Dark Blue            |                      |                      | Light Blue           |                      |                      | Dark Blue            | Dark Blue            | Dark Blue            | Dark Blue            | Light Blue           | Light Blue           | Dark Blue            |                      |                      |                      |                      |                      |                      | Dark Blue            |                      | Dark Blue  |  |
